# Supplementary material for: A palladium-catalyzed decarboxylative (5 + 5) cyclization reaction of vinyloxazolidine-2,4-diones: access to ten-membered N,O-containing heterocycles
Source: Royal Society of Chemistry journal article supplement (doi:10.1039/d4qo00609g), 2024-01-01

# A palladium-catalyzed decarboxylative (5 + 5) cyclization reaction of vinyloxazolidine-2,4-diones: access to ten-membered *N,O*-containing heterocycles

Xiao-Hui Fu,<sup>a,b,c</sup> Juan Liao,<sup>a,b,c</sup> Zhen-Hua Wang,<sup>\*,b</sup> Zhen-Zhen Ge,<sup>a,b,c</sup> Ming-Qiang Zhou,<sup>a,b,c</sup>  
Yong You,<sup>b</sup> Yan-Ping Zhang,<sup>b</sup> Jian-Qiang Zhao,<sup>b</sup> Ji-Hong Lu,<sup>d</sup> Wei-Cheng Yuan<sup>\*,a,b,c</sup>

---

<sup>a</sup>National Engineering Research Center of Chiral Drugs, Chengdu Institute of Organic Chemistry, Chinese Academy of Sciences, Chengdu 610041, China.

<sup>b</sup>Institute for Advanced Study, Chengdu University, Chengdu 610106, China.

<sup>c</sup>University of Chinese Academy of Sciences, Beijing 100049, China

<sup>d</sup>Zhejiang Jinhua Conba Bio-Pharm. Co. Ltd, Jinhua, 321016, China

E-mail: yuanwc@cioc.ac.cn

wangzhenhua@cdu.edu.cn

## Table of Contents

|                                                                                                  |     |
|--------------------------------------------------------------------------------------------------|-----|
| 1. General information. ....                                                                     | S1  |
| 2. General procedures for the synthesis of compounds <b>1a-1u</b> . ....                         | S1  |
| 3. General procedure for the synthesis of compounds <b>2a-2u</b> . ....                          | S2  |
| 4. Scale-up reaction for the synthesis of <b>2a</b> . ....                                       | S12 |
| 5. Procedures for further transformations. ....                                                  | S12 |
| 6. X-ray crystallographic data of <b>2a</b> and <b>4</b> . ....                                  | S14 |
| 7. <sup>1</sup> H NMR, <sup>13</sup> C NMR for compounds <b>2</b> , <b>3</b> and <b>4</b> . .... | S16 |

## 1. General information.

Reagents were purchased from commercial sources and were used as received unless mentioned otherwise. Flash column chromatography was performed over silica gel (H, purchased from Qingdao Ocean Chemical Co., Ltd. Qingdao, China). Analytical thin layer chromatography (TLC) was performed on silica gel HSGF254 glass plates (purchased from Yantai Xinuo Chemical Co., Ltd. Yantai, China) containing a 254 nm fluorescent indicator.  $^1\text{H}$  NMR spectra were measured on a Bruker AVANCE NEO 400 MHz spectrometer at the ambient temperature of 400 MHz. Proton chemical shifts are reported in parts per million ( $\delta$  scale) and referenced using tetramethylsilane (TMS) as an internal standard or residual protium in the NMR solvent [ $\text{CDCl}_3$ :  $\delta$  7.26 ( $\text{CHCl}_3$ ) or  $\text{DMSO-}d_6$ :  $\delta$  2.50 ( $\text{CD}_2\text{HSOCD}_3$ )]. Data are reported as follows: chemical shift [multi-plicity (s = singlet, d = doublet, t = triplet, q = quartet, m = multiplet, dd = doublet of doublets, td = triplet of doublets, brs = broad singlet), coupling constant(s) (Hz), integration].  $^{13}\text{C}$  NMR spectra were also measured on a Bruker AVANCE NEO 400 MHz spectrometer at the ambient temperature of  $^{13}\text{C}$  at 101MHz. Carbon chemical shifts are reported in parts per million ( $\delta$  scale), and referenced using the carbon resonances of the solvent [ $\delta$  77.16 ( $\text{CDCl}_3$ ) or  $\delta$  39.52 ( $\text{DMSO-}d_6$ )]. The melting points of products were recorded on a Büchi Melting Point B-545 and temperatures were not corrected. High-resolution mass spectra (HRMS) were recorded by Agilent 6545 LC/Q-TOF mass spectrometer by using an electrospray ionization (ESI) ionization source analyzed by quadrupole time-of-flight (Q-TOF).

## 2. General procedures for the synthesis of compounds 1a-1r.

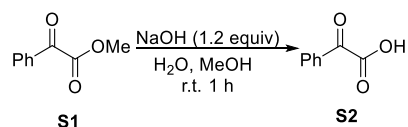

To a solution of **S1** (6.0 mL, 42 mmol, 1.0 equiv) in methanol (100 mL) and water (40 mL) was added NaOH (2.1 g, 1.2 equiv) under ice-bath. The mixture was stirred at room temperature for 1 h. After the completion of the reaction, methanol was removed in vacuo and the residue was acidified by conc. HCl to pH 1 under ice bath. The mixture was extracted with ethyl acetate (50 mL  $\times$  3) and washed with water (30 mL  $\times$  2), the combined organic extracts were dried over anhydrous sodium sulfate and concentrated under reduced pressure. The residue was used in the next step without further purification (**S2** as an off-white solid, 6.2 g, 98% yield).

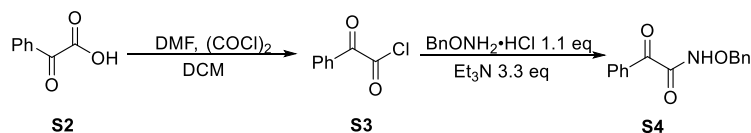

Oxalyl chloride (4.0 mL, 1.1 equiv) and two drops of DMF were added to a solution of **S2** (6.2 g, 41 mmol, 1.0 equiv) in dichloromethane (200 mL) under ice bath conditions and stirred at room temperature for 6 h. After the completion of the reaction, the suspension of 2-oxo-2-phenylacetyl chloride in DCM, was added *O*-benzyloxycarbonylhydroxylamine hydrochloride (7.2 g, 1.1 equiv) and  $\text{Et}_3\text{N}$  (19.0 mL, 3.3 equiv) at 0  $^\circ\text{C}$ . The reaction was stirred at room temperature for 12 h and monitored by TLC. When the material **S3** was completely disappeared, the reaction was quenched with water, and extracted with DCM (100 mL  $\times$  3). The combined organic extracts were dried over anhydrous sodium sulfate and concentrated under reduced pressure. The residue was purified by flash chromatography (petroleum ether/ethyl acetate = 5:1)

to provide **S4** (8.4 g, 80% yield).

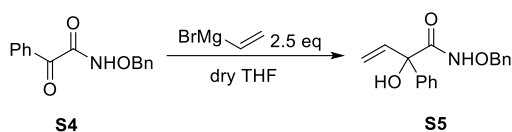

**S4** (2.4 g, 10 mmol, 1.0 equiv) was suspended in anhydrous THF (50 mL) under argon atmosphere and then cooled to 0 °C. Then 1 M solution of vinylmagnesium bromide (25 mL, 25 mmol, 2.5 equiv) was added slowly via cannulating needle and the solution was stirred for 2 h at room temperature. The mixture was quenched with saturated aqueous NH<sub>4</sub>Cl and extracted with DCM (100 mL × 3). The extracts were successively washed with water and brine, dried over anhydrous sodium sulfate and concentrated in vacuo. The residue was purified by chromatography over silica gel eluting with 20% ethyl acetate in hexane to afford the desired product **S5** (brown oil, 2.0 g, 70% yield).

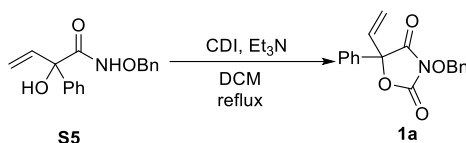

Et<sub>3</sub>N (2.0 mL, 2.0 equiv) and CDI (3.4 g, 3.0 equiv) were added to a solution of **S5** (2.0 g, 7 mmol, 1.0 equiv) in DCM (25 mL). The resulting solution was refluxed for 6 h. The residue was cooled to room temperature and then purified by flash column chromatography (ethyl acetate/hexane = 1:10) to afford 1.8 g of **1a** as a white solid (82% yield). If necessary, the crude product can be recrystallized in ethyl acetate and hexane.

**1b-1u** were prepared according to the above method for the preparation of **1a**.

### 3. General procedure for the synthesis of compounds **2a-2u**.

To an oven-dried 25 mL of Schlenk tube equipped with a stir bar, Pd(PPh<sub>3</sub>)<sub>4</sub> (5 mol%) and 5-vinyloxazolidine-2,4-diones **1a-1u** (0.2 mmol) was added along with THF (1.0 mL). The reaction was stirred at 25 °C under argon atmosphere until complete consumption of **1a-1u** as monitored by thin layer chromatography. The reaction mixture was directly purified by silica gel column chromatography to afford the desired products **2a-2u**.

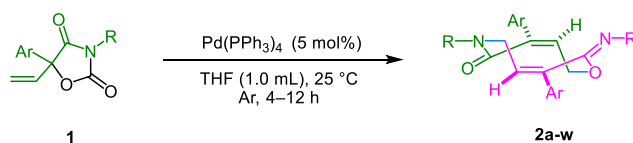

**(3Z,8Z,10E)-6-(benzyloxy)-10-((benzyloxy)imino)-4,9-diphenyl-7,10-dihydro-2H-1,6-oxazecin-5(6H)-one (2a)**

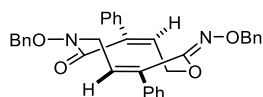

Prepared according to general procedure using corresponding 5-vinyloxazolidine-2,4-dione (61.6 mg, 0.20 mmol). The crude product was purified by flash chromatography on silica gel (eluted with EtOAc : hexanes = 5:1) to give the product **2a** as white solid, 37.1 mg, 70% yield, m.p. 149.8 – 150.1 °C.

<sup>1</sup>H NMR (400 MHz, CDCl<sub>3</sub>) δ 7.39 – 7.28 (m, 6H), 7.25 (d, *J* = 6.3 Hz, 7H), 7.20 (d, *J* = 4.5 Hz, 4H), 7.08 (dd, *J* = 16.0, 7.1 Hz, 3H), 6.62 (dd, *J* = 11.1, 4.4 Hz, 1H), 6.23 (t, *J* = 7.9 Hz, 1H), 5.01 (d, *J* = 17.0 Hz, 3H), 4.90 (d, *J* = 10.8 Hz, 1H), 4.58 – 4.43 (m, 3H), 3.54 (dd, *J* = 15.1, 4.6 Hz, 1H).

$^{13}\text{C}$  NMR (101 MHz,  $\text{CDCl}_3$ )  $\delta$  166.7, 152.9, 140.6, 137.8, 136.0, 135.2, 135.1, 134.4, 129.7, 129.3, 129.2, 129.1, 129.0, 128.8, 128.7, 128.4, 128.2, 128.1, 127.9, 126.7, 126.3, 125.4, 76.6, 76.3, 67.3, 48.6.

HRMS (ESI) calcd. for  $\text{C}_{34}\text{H}_{31}\text{N}_2\text{O}_4$   $[\text{M} + \text{H}]^+$  531.2278; found: 531.2282.

(3*Z*,8*Z*,10*E*)-6-(benzyloxy)-10-((benzyloxy)imino)-4,9-bis(4-fluorophenyl)-7,10-dihydro-2*H*-1,6-oxazecin-5(6*H*)-one (2b)

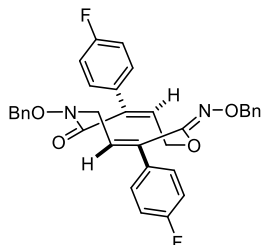

Prepared according to general procedure using corresponding 5-vinyloxazolidine-2,4-dione (65.4 mg, 0.20 mmol). The crude product was purified by flash chromatography on silica gel (eluted with EtOAc : hexanes = 5:1) to give the product **2b** as white solid, 22.4 mg, 40% yield, m.p. 153.9 – 154.1 °C.

$^1\text{H}$  NMR (400 MHz,  $\text{CDCl}_3$ )  $\delta$  7.44 – 7.40 (m, 2H), 7.39 – 7.32 (m, 6H), 7.29 – 7.10 (m, 6H), 7.07 – 6.95 (m, 4H), 6.64 (dd,  $J = 10.9, 4.5$  Hz, 1H), 6.23 (dd,  $J = 10.7, 4.9$  Hz, 1H), 5.12 (s, 2H), 5.10 – 4.97 (m, 2H), 4.64 – 4.47 (m, 3H), 3.61 (dd,  $J = 14.9, 4.6$  Hz, 1H).

$^{13}\text{C}$  NMR (101 MHz,  $\text{CDCl}_3$ )  $\delta$  166.7, 164.6 (d,  $J = 3.0$  Hz), 163.4 (d,  $J = 249.2$  Hz), 162.2 (d,  $J = 2.8$  Hz), 162.1, 152.8, 139.8, 137.8, 135.0, 133.6, 132.0 (d,  $J = 3.3$  Hz), 131.3 (d,  $J = 3.3$  Hz), 129.8, 129.2, 128.7 (d,  $J = 8.4$  Hz), 128.6, 128.5, 128.4, 128.2, 128.1, 125.3, 116.1 (d,  $J = 21.8$  Hz), 115.8 (d,  $J = 21.7$  Hz), 76.8, 76.4, 67.3, 47.4.

$^{19}\text{F}$  NMR (376 MHz,  $\text{CDCl}_3$ )  $\delta$  -111.77, -112.21.

HRMS (ESI) calcd. for  $\text{C}_{34}\text{H}_{29}\text{F}_2\text{N}_2\text{O}_4$   $[\text{M} + \text{H}]^+$  567.2090; found: 567.2092.

(3*Z*,8*Z*,10*E*)-6-(benzyloxy)-10-((benzyloxy)imino)-4,9-bis(4-chlorophenyl)-7,10-dihydro-2*H*-1,6-oxazecin-5(6*H*)-one (2c)

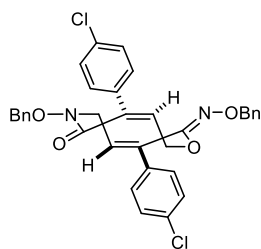

Prepared according to general procedure using corresponding 5-vinyloxazolidine-2,4-dione (68.6 mg, 0.20 mmol). The crude product was purified by flash chromatography on silica gel (eluted with EtOAc : hexanes = 7:1) to give the product **2c** as white solid, 18.1 mg, 30% yield, m.p. 157.9 – 158.2 °C.

$^1\text{H}$  NMR (400 MHz,  $\text{CDCl}_3$ )  $\delta$  7.37 – 7.35 (m, 2H), 7.30 (d,  $J = 5.4$  Hz, 3H), 7.27 – 7.19 (m, 8H), 7.17 – 7.14 (m, 5H), 6.60 (dd,  $J = 10.8, 4.5$  Hz, 1H), 6.18 (dd,  $J = 10.9, 4.8$  Hz, 1H), 5.03 (s, 2H), 5.01 – 4.87 (m, 2H), 4.54 – 4.41 (m, 3H), 3.53 (dd,  $J = 14.9, 4.6$  Hz, 1H).

$^{13}\text{C}$  NMR (101 MHz,  $\text{CDCl}_3$ )  $\delta$  166.5, 152.5, 139.8, 137.7, 135.4, 135.2, 134.9, 134.4, 133.6, 133.5, 129.8, 129.4, 129.3, 129.0, 128.8, 128.6, 128.5, 128.4, 128.2, 128.1, 127.7, 125.8, 76.8, 76.4, 67.2, 48.5.

HRMS (ESI) calcd. for  $\text{C}_{34}\text{H}_{29}\text{Cl}_2\text{N}_2\text{O}_4$   $[\text{M} + \text{H}]^+$  599.1499; found: 599.1502.

**(3Z,8Z,10E)-6-(benzyloxy)-10-((benzyloxy)imino)-4,9-bis(4-bromophenyl)-7,10-dihydro-2H-1,6-oxazecin-5(6H)-one (2d)**

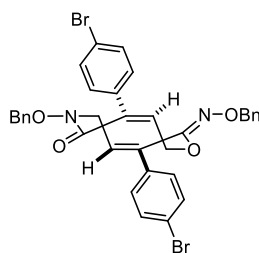

Prepared according to general procedure using corresponding 5-vinyloxazolidine-2,4-dione (77.4 mg, 0.20 mmol). The crude product was purified by flash chromatography on silica gel (eluted with EtOAc : hexanes = 5:1) to give the product **2d** as white solid, 37.1 mg, 54% yield, m.p. 160.2 – 160.4 °C.

**<sup>1</sup>H NMR (400 MHz, CDCl<sub>3</sub>)** δ 7.48 – 7.38 (m, 8H), 7.35 – 7.31 (m, 2H), 7.26 – 7.18 (m, 6H), 7.13 (d, *J* = 8.5 Hz, 2H), 6.68 (dd, *J* = 10.8, 4.5 Hz, 1H), 6.27 (dd, *J* = 10.9, 4.8 Hz, 1H), 5.11 (s, 2H), 5.08 – 4.96 (m, 2H), 4.61 – 4.49 (m, 3H), 3.68 – 3.61 (m, 1H).

**<sup>13</sup>C NMR (101 MHz, CDCl<sub>3</sub>)** δ 166.0, 152.5, 139.9, 136.8, 134.9, 134.9, 134.0, 133.7, 132.2, 132.0, 129.8, 129.3, 128.8, 128.6, 128.5, 128.4, 128.3, 128.2, 127.9, 125.9, 123.6, 123.5, 77.4, 76.4, 67.3, 49.2.

**HRMS (ESI)** calcd. for C<sub>34</sub>H<sub>29</sub>Br<sub>2</sub>N<sub>2</sub>O<sub>4</sub> [M + H]<sup>+</sup> 687.0489; found: 687.0486.

**(3Z,8Z,10E)-6-(benzyloxy)-10-((benzyloxy)imino)-4,9-di-*p*-tolyl-7,10-dihydro-2H-1,6-oxazecin-5(6H)-one (2e)**

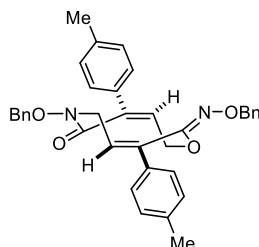

Prepared according to general procedure using corresponding 5-vinyloxazolidine-2,4-dione (64.6 mg, 0.20 mmol). The crude product was purified by flash chromatography on silica gel (eluted with EtOAc : hexanes = 5:1) to give the product **2e** as white solid, 32.2 mg, 58% yield, m.p. 144.0 – 144.5 °C.

**<sup>1</sup>H NMR (400 MHz, CDCl<sub>3</sub>)** δ 7.51 – 7.43 (m, 2H), 7.39 – 7.36 (m, 2H), 7.36 – 7.31 (m, 2H), 7.30 – 7.26 (m, 4H), 7.25 – 7.14 (m, 6H), 7.11 (d, *J* = 7.9 Hz, 2H), 6.67 (dd, *J* = 10.9, 4.5 Hz, 1H), 6.29 (dd, *J* = 8.6, 7.1 Hz, 1H), 5.19 – 5.06 (m, 3H), 4.99 (d, *J* = 10.8 Hz, 1H), 4.67 – 4.46 (m, 3H), 3.62 (dd, *J* = 14.9, 4.5 Hz, 1H), 2.40 (s, 3H), 2.33 (s, 3H).

**<sup>13</sup>C NMR (101 MHz, CDCl<sub>3</sub>)** δ 167.0, 152.6, 140.0, 139.4, 139.2, 138.5, 135.9, 134.3, 133.2, 131.9, 129.7, 129.6, 129.2, 129.1, 128.8, 128.5, 128.2, 127.9, 127.2, 126.7, 126.3, 124.2, 76.6, 76.4, 67.4, 48.7, 21.4, 21.4.

**HRMS (ESI)** calcd. for C<sub>36</sub>H<sub>35</sub>N<sub>2</sub>O<sub>4</sub> [M + H]<sup>+</sup> 559.2591; found: 559.2588.

**(3Z,8Z,10E)-6-(benzyloxy)-10-((benzyloxy)imino)-4,9-bis(4-methoxyphenyl)-7,10-dihydro-2H-1,6-oxazecin-5(6H)-one (2f)**

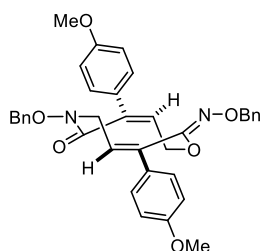

Prepared according to general procedure using corresponding 5-vinyloxazolidine-2,4-dione (67.8 mg, 0.20 mmol). The crude product was purified by flash chromatography on silica gel (eluted with EtOAc : hexanes = 5:1) to give the product **2f** as white solid, 18.3 mg, 31% yield, m.p. 161.8 – 162.1 °C.

**<sup>1</sup>H NMR (400 MHz, CDCl<sub>3</sub>)** δ 7.48 – 7.45 (m, 2H), 7.40 – 7.32 (m, 6H), 7.31 – 7.28 (m, 3H), 7.24 – 7.14 (m, 3H), 6.88 (d, *J* = 8.5 Hz, 2H), 6.82 (d, *J* = 8.8 Hz, 2H), 6.61 (dd, *J* = 11.0, 4.5 Hz, 1H), 6.23 (dd, *J* = 9.3, 6.4 Hz, 1H), 5.17 – 5.08 (m, 3H), 5.00 (d, *J* = 10.8 Hz, 1H), 4.64 – 4.51 (m, 3H), 3.86 (s, 3H), 3.80 (s, 3H), 3.60 (dd, *J* = 14.9, 4.5 Hz, 1H).

**<sup>13</sup>C NMR (101 MHz, CDCl<sub>3</sub>)** δ 167.1, 160.5, 160.4, 153.3, 140.1, 138.0, 135.2, 133.9, 129.7, 129.1, 128.8, 128.6, 128.5, 128.3, 128.2, 127.9, 127.8, 127.7, 126.2, 123.5, 114.4, 114.2, 76.6, 76.3, 67.5, 55.6, 55.5, 48.6.

**HRMS (ESI)** calcd. for C<sub>36</sub>H<sub>34</sub>N<sub>2</sub>O<sub>6</sub>Na [M + Na]<sup>+</sup> 613.2309; found: 613.2309.

**(3Z,8Z,10Z)-6-methoxy-10-(methoxyimino)-4,9-diphenyl-7,10-dihydro-2H-1,6-oxazecin-5(6H)-one (2g)**

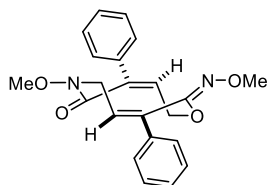

Prepared according to general procedure using corresponding 5-vinyloxazolidine-2,4-dione (46.6 mg, 0.20 mmol). The crude product was purified by flash chromatography on silica gel (eluted with EtOAc : hexanes = 5:1) to give the product **2g** as white solid, 34.0 mg, 90% yield, m.p. 146.2 – 146.9 °C.

**<sup>1</sup>H NMR (400 MHz, CDCl<sub>3</sub>)** δ 7.49 – 7.47 (m, 4H), 7.44 – 7.31 (m, 6H), 6.75 (dd, *J* = 10.8, 4.6 Hz, 1H), 6.36 (dd, *J* = 9.9, 5.6 Hz, 1H), 4.81 (dd, *J* = 15.0, 10.8 Hz, 1H), 4.66 – 4.55 (m, 2H), 4.02 (dd, *J* = 15.0, 4.6 Hz, 1H), 3.98 (s, 3H), 3.90 (s, 3H).

**<sup>13</sup>C NMR (101 MHz, CDCl<sub>3</sub>)** δ 166.2, 152.4, 140.0, 136.2, 135.2, 134.6, 129.4, 129.3, 129.2, 128.9, 128.3, 126.8, 126.3, 125.4, 67.3, 62.9, 61.1, 47.4.

**HRMS (ESI)** calcd. for C<sub>22</sub>H<sub>23</sub>N<sub>2</sub>O<sub>4</sub> [M + H]<sup>+</sup> 379.1652; found: 379.1651.

**(3Z,8Z,10Z)-4,9-bis(4-fluorophenyl)-6-methoxy-10-(methoxyimino)-7,10-dihydro-2H-1,6-oxazecin-5(6H)-one (2h)**

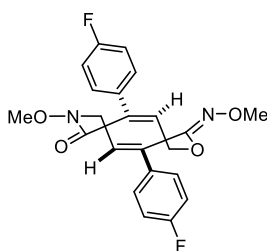

Prepared according to general procedure using corresponding 5-vinyloxazolidine-2,4-dione (50.2 mg, 0.20 mmol). The crude product was purified by flash chromatography on silica gel (eluted with EtOAc : hexanes = 5:1) to give the product **2h** as colorless oil, 27.6 mg, 67% yield.

**<sup>1</sup>H NMR (400 MHz, CDCl<sub>3</sub>)** δ 7.47 – 7.40 (m, 4H), 7.10 – 7.01 (m, 4H), 6.68 (dd, *J* = 10.7, 4.7 Hz, 1H), 6.28 (dd, *J* = 10.9, 4.7 Hz, 1H), 4.76 (dd, *J* = 14.9, 10.7 Hz, 1H), 4.66 – 4.50 (m, 2H), 4.05 – 3.94 (m, 4H), 3.88 (s, 3H).

**<sup>13</sup>C NMR (101 MHz, CDCl<sub>3</sub>)** δ 166.1, 163.4 (dd, *J* = 242.5 Hz, *J* = 242.4 Hz), 152.2, 139.8, 133.8, 132.3 (d, *J* = 3.3 Hz), 131.3 (d, *J* = 3.2 Hz), 128.8 (d, *J* = 8.3 Hz), 128.7 (d, *J* = 8.4 Hz), 128.1, 128.0, 125.2, 116.2 (d, *J* = 21.8 Hz), 115.9 (d, *J* = 21.7 Hz), 67.3, 62.9, 61.7, 47.3.

**<sup>19</sup>F NMR (376 MHz, CDCl<sub>3</sub>)** δ -111.6, -112.1.

**HRMS (ESI)** calcd. for C<sub>22</sub>H<sub>20</sub>F<sub>2</sub>N<sub>2</sub>O<sub>4</sub>Na [M + Na]<sup>+</sup> 437.1283; found: 437.1301.

**(3*Z*,8*Z*,10*Z*)-4,9-bis(4-chlorophenyl)-6-methoxy-10-(methoxyimino)-7,10-dihydro-2*H*-1,6-oxazecin-5(6*H*)-one (2i)**

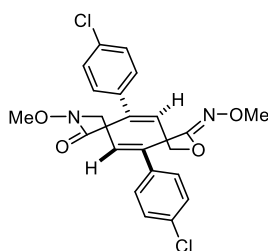

Prepared according to general procedure using corresponding 5-vinyloxazolidine-2,4-dione (53.4 mg, 0.20 mmol). The crude product was purified by flash chromatography on silica gel (eluted with EtOAc : hexanes = 5:1) to give the product **2i** as colorless oil, 31.8 mg, 71% yield.

**<sup>1</sup>H NMR (400 MHz, CDCl<sub>3</sub>)** δ 7.42 – 7.36 (m, 6H), 7.35 – 7.31 (m, 2H), 6.71 (dd, *J* = 10.6, 4.7 Hz, 1H), 6.32 (dd, *J* = 10.9, 4.6 Hz, 1H), 4.74 (dd, *J* = 15.0, 10.7 Hz, 1H), 4.65 – 4.51 (m, 2H), 4.03 – 3.98 (m, 1H), 3.96 (s, 3H), 3.87 (s, 3H).

**<sup>13</sup>C NMR (101 MHz, CDCl<sub>3</sub>)** δ 165.9, 152.0, 139.8, 135.6, 135.3, 134.6, 133.8, 133.5, 129.4, 129.1, 128.6, 128.1, 127.6, 125.7, 67.2, 62.9, 61.7, 47.2.

**HRMS (ESI)** calcd. for C<sub>22</sub>H<sub>21</sub><sup>35</sup>Cl<sub>2</sub>N<sub>2</sub>O<sub>4</sub> [M + H]<sup>+</sup> 447.0873; found: 447.0878.

**(3*Z*,8*Z*,10*Z*)-4,9-bis(4-bromophenyl)-6-methoxy-10-(methoxyimino)-7,10-dihydro-2*H*-1,6-oxazecin-5(6*H*)-one (2j)**

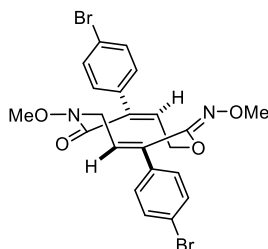

Prepared according to general procedure using corresponding 5-vinyloxazolidine-2,4-dione (62.4 mg, 0.20 mmol). The crude product was purified by flash chromatography on silica gel (eluted with EtOAc : hexanes = 5:1) to give the product **2j** as white solid, 17.1 mg, 32% yield. m.p. 158.3 – 159.2 °C.

**<sup>1</sup>H NMR (400 MHz, CDCl<sub>3</sub>)** δ 7.55 – 7.47 (m, 4H), 7.33 (dd, *J* = 8.6, 1.6 Hz, 4H), 6.72 (dd, *J* = 10.6, 4.7 Hz, 1H), 6.33 (dd, *J* = 10.9, 4.6 Hz, 1H), 4.74 (dd, *J* = 15.0, 10.6 Hz, 1H), 4.66 – 4.47 (m, 2H), 3.96 (s, 4H), 3.87 (s, 3H).

$^{13}\text{C}$  NMR (101 MHz,  $\text{CDCl}_3$ )  $\delta$  165.8, 151.9, 139.9, 135.1, 134.0, 133.8, 132.4, 132.1, 128.6, 128.4, 127.8, 125.8, 123.8, 123.6, 67.3, 63.0, 61.7, 47.3.

HRMS (ESI) calcd. for  $\text{C}_{22}\text{H}_{21}\text{Br}_2\text{N}_2\text{O}_4$   $[\text{M} + \text{H}]^+$  534.9863; found: 534.9863.

**(3Z,8Z,10Z)-6-methoxy-10-(methoxyimino)-4,9-di-*p*-tolyl-7,10-dihydro-2H-1,6-oxazecin-5(6H)-one (2k)**

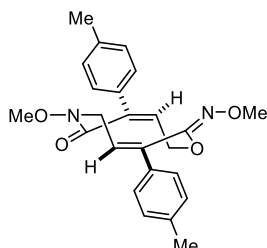

Prepared according to general procedure using corresponding 5-vinyloxazolidine-2,4-dione (49.4 mg, 0.20 mmol). The crude product was purified by flash chromatography on silica gel (eluted with EtOAc : hexanes = 5:1) to give the product **2k** as white solid, 27.7 mg, 68% yield, m.p. 165.1-165.7 °C.

$^1\text{H}$  NMR (400 MHz,  $\text{CDCl}_3$ )  $\delta$  7.38 – 7.36 (m, 4H), 7.19 (dd,  $J$  = 16.8, 7.9 Hz, 4H), 6.71 (dd,  $J$  = 10.9, 4.6 Hz, 1H), 6.31 (dd,  $J$  = 10.1, 5.6 Hz, 1H), 4.78 (dd,  $J$  = 14.9, 10.9 Hz, 1H), 4.64 – 4.52 (m, 2H), 3.97 (s, 4H), 3.89 (s, 3H), 2.35 (d,  $J$  = 9.7 Hz, 6H).

$^{13}\text{C}$  NMR (101 MHz,  $\text{CDCl}_3$ )  $\delta$  166.4, 152.6, 140.5, 139.5, 139.3, 134.5, 133.3, 132.4, 129.8, 129.6, 127.3, 126.7, 126.2, 124.5, 67.4, 62.8, 61.6, 47.3, 21.4, 21.4.

HRMS (ESI) calcd. for  $\text{C}_{24}\text{H}_{26}\text{N}_2\text{O}_4\text{Na}$   $[\text{M} + \text{Na}]^+$  429.1785; found: 429.1783.

**(3Z,8Z,10Z)-6-methoxy-10-(methoxyimino)-4,9-bis(4-methoxyphenyl)-7,10-dihydro-2H-1,6-oxazecin-5(6H)-one (2l)**

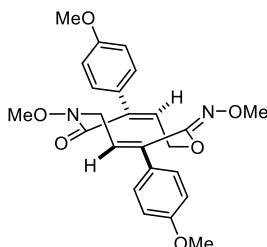

Prepared according to general procedure using corresponding 5-vinyloxazolidine-2,4-dione (52.6 mg, 0.20 mmol). The crude product was purified by flash chromatography on silica gel (eluted with EtOAc : hexanes = 3:1) to give the product **2l** as colorless oil, 26.6 mg, 61% yield.

$^1\text{H}$  NMR (400 MHz,  $\text{CDCl}_3$ )  $\delta$  7.42 – 7.40 (m, 4H), 6.92 – 6.89 (m, 4H), 6.64 (dd,  $J$  = 10.9, 4.6 Hz, 1H), 6.24 (dd,  $J$  = 10.4, 5.2 Hz, 1H), 4.76 (dd,  $J$  = 14.9, 10.9 Hz, 1H), 4.64 – 4.51 (m, 2H), 3.98 (d,  $J$  = 17.0 Hz, 4H), 3.89 (s, 3H), 3.82 (d,  $J$  = 7.5 Hz, 6H).

$^{13}\text{C}$  NMR (101 MHz,  $\text{CDCl}_3$ )  $\delta$  166.5, 160.6, 160.4, 152.7, 140.1, 134.0, 128.6, 128.1, 127.6, 126.2, 123.4, 114.5, 114.2, 77.4, 67.4, 62.8, 61.6, 55.5, 55.4, 47.3.

HRMS (ESI) calcd. for  $\text{C}_{24}\text{H}_{27}\text{N}_2\text{O}_6$   $[\text{M} + \text{H}]^+$  439.1864; found: 439.1872.

**(3Z,8Z,10E)-6-ethoxy-10-(ethoxyimino)-4,9-diphenyl-7,10-dihydro-2H-1,6-oxazecin-5(6H)-one (2m)**



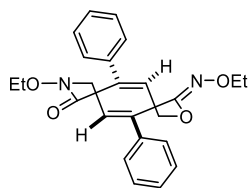

Prepared according to general procedure using corresponding 5-vinyloxazolidine-2,4-dione (49.4 mg, 0.20 mmol). The crude product was purified by flash chromatography on silica gel (eluted with EtOAc : hexanes = 5:1) to give the product **2m** as white solid, 22.9 mg, 56% yield, m.p. 131.4 – 131.7 °C.

**<sup>1</sup>H NMR (400 MHz, CDCl<sub>3</sub>)** δ 7.50 – 7.47 (m, 4H), 7.42 – 7.32 (m, 6H), 6.78 (dd, *J* = 10.8, 4.6 Hz, 1H), 6.36 (dd, *J* = 10.0, 5.7 Hz, 1H), 4.84 (dd, *J* = 14.8, 10.9 Hz, 1H), 4.70 – 4.51 (m, 2H), 4.28 – 4.13 (m, 3H), 4.08 (dd, *J* = 8.7, 7.0 Hz, 1H), 3.97 (dd, *J* = 14.9, 4.6 Hz, 1H), 1.40 – 1.32 (m, 6H).

**<sup>13</sup>C NMR (101 MHz, CDCl<sub>3</sub>)** δ 166.6, 152.3, 140.8, 136.2, 135.3, 134.8, 129.3, 129.2, 129.1, 128.9, 128.3, 126.8, 126.3, 125.5, 70.5, 69.8, 67.3, 48.0, 15.0, 13.9.

**HRMS (ESI)** calcd. for C<sub>24</sub>H<sub>26</sub>N<sub>2</sub>O<sub>4</sub>Na [M + Na]<sup>+</sup> 429.1785; found: 429.1785.

**(3Z,8Z)-6-ethoxy-10-(ethoxyimino)-4,9-bis(4-fluorophenyl)-7,10-dihydro-2H-1,6-oxazecin-5(6H)-one (2n)**

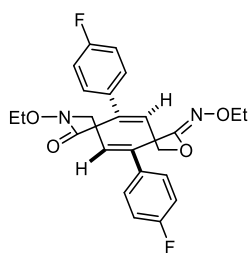

Prepared according to general procedure using corresponding 5-vinyloxazolidine-2,4-dione (50.2 mg, 0.20 mmol). The crude product was purified by flash chromatography on silica gel (eluted with EtOAc : hexanes = 5:1) to give the product **2n** as colorless oil, 30.0 mg, 68% yield.

**<sup>1</sup>H NMR (400 MHz, CDCl<sub>3</sub>)** δ 7.52 – 7.33 (m, 4H), 7.12 – 6.97 (m, 4H), 6.70 (dd, *J* = 10.9, 4.6 Hz, 1H), 6.29 (dd, *J* = 11.1, 4.6 Hz, 1H), 4.79 (dd, *J* = 14.8, 10.8 Hz, 1H), 4.65 – 4.50 (m, 2H), 4.25 – 3.93 (m, 5H), 1.32 (dt, *J* = 10.7, 7.0 Hz, 6H).

**<sup>13</sup>C NMR (101 MHz, CDCl<sub>3</sub>)** δ 166.4, 164.6 (d, *J* = 6.9 Hz), 162.1 (d, *J* = 6.2 Hz), 152.1, 139.9, 133.9, 132.3 (d, *J* = 3.4 Hz), 131.4 (d, *J* = 3.3 Hz), 128.7, 128.6, 128.1, 128.1, 128.0, 125.2, 116.3, 116.0, 116.0, 115.8, 70.5, 69.9, 67.2, 47.9, 14.9, 13.8.

**<sup>19</sup>F NMR (376 MHz, CDCl<sub>3</sub>)** δ -111.77, -112.23.

**HRMS (ESI)** calcd. for C<sub>24</sub>H<sub>25</sub>F<sub>2</sub>N<sub>2</sub>O<sub>4</sub> [M + H]<sup>+</sup> 443.1777; found: 443.1779.

**(3Z,8Z,10E)-4,9-bis(4-chlorophenyl)-6-ethoxy-10-(ethoxyimino)-7,10-dihydro-2H-1,6-oxazecin-5(6H)-one (2o)**

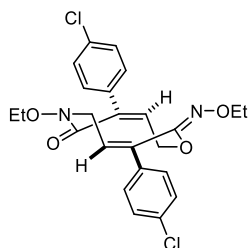

Prepared according to general procedure using corresponding 5-vinyloxazolidine-2,4-dione (56.2 mg, 0.20 mmol). The crude product was purified by flash chromatography on silica gel (eluted with EtOAc : hexanes = 5:1) to give the product **2o** as colorless oil, 27.2 mg, 57% yield.

**<sup>1</sup>H NMR (400 MHz, CDCl<sub>3</sub>)** δ 7.43 – 7.31 (m, 8H), 6.74 (dd, *J* = 10.8, 4.7 Hz, 1H), 6.33 (dd, *J* = 11.1, 4.6 Hz, 1H), 4.77 (dd, *J* = 14.9, 10.7 Hz, 1H), 4.65 – 4.50 (m, 2H), 4.23 – 3.93 (m, 5H), 1.32 (dt, *J* = 10.0, 7.1 Hz, 6H).

**<sup>13</sup>C NMR (101 MHz, CDCl<sub>3</sub>)** δ 166.3, 151.8, 139.9, 135.5, 135.3, 134.6, 133.9, 133.7, 129.4, 129.1, 128.6, 128.1, 127.6, 125.8, 70.6, 69.9, 67.2, 47.9, 15.0, 13.9.

**HRMS (ESI)** calcd. for C<sub>24</sub>H<sub>24</sub>Cl<sub>2</sub>N<sub>2</sub>O<sub>4</sub>Na [M + Na]<sup>+</sup> 497.1005; found: 497.1010.

**(3*Z*,8*Z*)-4,9-bis(4-bromophenyl)-6-ethoxy-10-(ethoxyimino)-7,10-dihydro-2*H*-1,6-oxazecin-5(6*H*)-one (2p)**

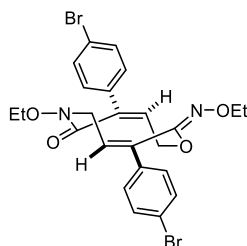

Prepared according to general procedure using corresponding 5-vinyloxazolidine-2,4-dione (65.2 mg, 0.20 mmol). The crude product was purified by flash chromatography on silica gel (eluted with EtOAc : hexanes = 5:1) to give the product **2p** as colorless oil, 25.0 mg, 44% yield.

**<sup>1</sup>H NMR (400 MHz, CDCl<sub>3</sub>)** δ 7.53 – 7.47 (m, 4H), 7.34 (dd, *J* = 8.6, 2.5 Hz, 4H), 6.75 (dd, *J* = 10.7, 4.7 Hz, 1H), 6.34 (dd, *J* = 11.1, 4.6 Hz, 1H), 4.77 (dd, *J* = 14.9, 10.8 Hz, 1H), 4.65 – 4.48 (m, 2H), 4.24 – 4.02 (m, 4H), 3.95 (dd, *J* = 14.8, 4.7 Hz, 1H), 1.32 (t, *J* = 7.0 Hz, 6H).

**<sup>13</sup>C NMR (101 MHz, CDCl<sub>3</sub>)** δ 166.2, 151.8, 140.1, 135.1, 134.2, 134.0, 132.3, 132.1, 128.7, 128.4, 127.8, 125.9, 123.7, 123.5, 70.6, 70.0, 67.2, 47.9, 15.0, 13.9.

**HRMS (ESI)** calcd. for C<sub>24</sub>H<sub>24</sub>Br<sub>2</sub>N<sub>2</sub>O<sub>4</sub>Na [M + Na]<sup>+</sup> 584.9995; found: 585.0003.

**(3*Z*,8*Z*)-6-ethoxy-10-(ethoxyimino)-4,9-di-*p*-tolyl-7,10-dihydro-2*H*-1,6-oxazecin-5(6*H*)-one (2q)**

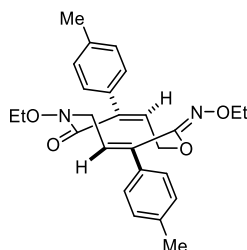

Prepared according to general procedure using corresponding 5-vinyloxazolidine-2,4-dione (52.2 mg, 0.20 mmol). The crude product was purified by flash chromatography on silica gel (eluted with EtOAc : hexanes = 5:1) to give the product **2q** as white solid, 31.0 mg, 71% yield, 134.2 – 134.8°C.

**<sup>1</sup>H NMR (400 MHz, CDCl<sub>3</sub>)** δ 7.38 – 7.37 (m, 4H), 7.20 – 7.15 (m, 4H), 6.73 (dd, *J* = 10.9, 4.6 Hz, 1H), 6.32 (dd, *J* = 10.0, 5.7 Hz, 1H), 4.82 (dd, *J* = 14.8, 10.9 Hz, 1H), 4.63 – 4.52 (m, 2H), 4.26 – 4.12 (m, 3H), 4.11 – 4.03 (m, 1H), 3.94 (dd, *J* = 14.8, 4.6 Hz, 1H), 2.36 (d, *J* = 8.0 Hz, 6H), 1.41 – 1.32 (m, 6H).

$^{13}\text{C}$  NMR (101 MHz,  $\text{CDCl}_3$ )  $\delta$  166.8, 152.5, 140.7, 139.4, 139.2, 134.6, 133.4, 132.5, 129.7, 129.5, 127.3, 126.7, 126.2, 124.6, 70.4, 69.7, 67.3, 48.0 (2C), 21.3, 14.9, 13.9.

HRMS (ESI) calcd. for  $\text{C}_{26}\text{H}_{30}\text{N}_2\text{O}_4\text{Na}$   $[\text{M} + \text{Na}]^+$  457.2098; found: 457.2109.

**(3Z,8Z,10Z)-6-methoxy-10-(ethoxyimino)-4,9-bis(4-methoxyphenyl)-7,10-dihydro-2H-1,6-oxazecin-5(6H)-one (2r)**

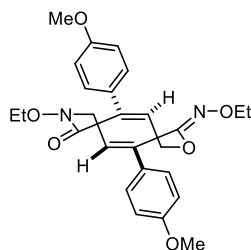

Prepared according to general procedure using corresponding 5-vinyloxazolidine-2,4-dione (55.4 mg, 0.20 mmol). The crude product was purified by flash chromatography on silica gel (eluted with EtOAc : hexanes = 5:1) to give the product **2r** as colorless oil, 29.3 mg, 63% yield.

$^1\text{H}$  NMR (400 MHz,  $\text{CDCl}_3$ )  $\delta$  7.42 (dd,  $J = 9.0, 3.0$  Hz, 4H), 6.94 – 6.85 (m, 4H), 6.68 (dd,  $J = 10.9, 4.6$  Hz, 1H), 6.26 (dd,  $J = 10.5, 5.3$  Hz, 1H), 4.81 (dd,  $J = 14.8, 11.0$  Hz, 1H), 4.59 (dd,  $J = 13.3, 7.8$  Hz, 2H), 4.22 – 3.92 (m, 5H), 3.82 (d,  $J = 6.2$  Hz, 6H), 1.41 – 1.33 (m, 6H).

$^{13}\text{C}$  NMR (101 MHz,  $\text{CDCl}_3$ )  $\delta$  166.8, 152.5, 140.7, 139.4, 139.2, 134.6, 133.4, 132.5, 129.7, 129.5, 129.1, 127.3, 126.7, 126.2, 124.6, 70.4, 69.7, 67.3, 48.0, 21.3, 14.9, 13.9.

HRMS (ESI) calcd. for  $\text{C}_{26}\text{H}_{30}\text{N}_2\text{O}_6\text{Na}$   $[\text{M} + \text{Na}]^+$  489.1996; found: 489.2010.

**(3Z,8Z,10E)-6-(benzyloxy)-10-((benzyloxy)imino)-4,9-bis(3,4-dimethylphenyl)-7,10-dihydro-2H-1,6-oxazecin-5(6H)-one (2s)**

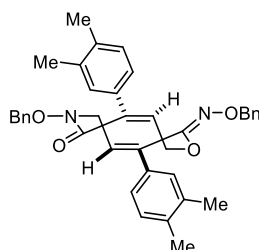

Prepared according to general procedure using corresponding 5-vinyloxazolidine-2,4-dione (67.4 mg, 0.20 mmol). The crude product was purified by flash chromatography on silica gel (eluted with EtOAc : hexanes = 5:1) to give the product **2s** as white solid, 20.1 mg, 34% yield, m.p. 168.5 – 169.0 °C.

$^1\text{H}$  NMR (400 MHz,  $\text{CDCl}_3$ )  $\delta$  7.51 – 7.45 (m, 2H), 7.40 – 7.31 (m, 5H), 7.29 – 7.20 (m, 2H), 7.20 – 7.06 (m, 7H), 6.66 (dd,  $J = 11.0, 4.4$  Hz, 1H), 6.31 (t,  $J = 7.9$  Hz, 1H), 5.12 (d,  $J = 9.9$  Hz, 3H), 5.00 (d,  $J = 10.8$  Hz, 1H), 4.67 – 4.54 (m, 3H), 3.62 (dd,  $J = 15.0, 4.5$  Hz, 1H), 2.30 (d,  $J = 9.1$  Hz, 6H), 2.21 (d,  $J = 7.1$  Hz, 6H).

$^{13}\text{C}$  NMR (101 MHz,  $\text{CDCl}_3$ )  $\delta$  167.1, 153.3, 140.6, 138.1, 137.9, 137.2, 137.1, 135.2, 134.5, 133.6, 132.8, 130.3, 130.0, 129.7, 129.1, 128.9, 128.8, 128.4, 128.1, 128.0, 127.9, 127.4, 127.1, 124.4, 124.3, 123.9, 76.5, 76.4, 67.4, 48.8, 20.1, 19.9, 19.8, 19.7.

HRMS (ESI) calcd. for  $\text{C}_{38}\text{H}_{39}\text{N}_2\text{O}_4$   $[\text{M} + \text{H}]^+$  587.2904; found: 587.2908.

**(3Z,8Z,10E)-6-(benzyloxy)-10-((benzyloxy)imino)-4,9-bis(2,5-dimethoxyphenyl)-7,10-dihydro-2H-**

### 1,6-oxazecin-5(6*H*)-one (**2t**)

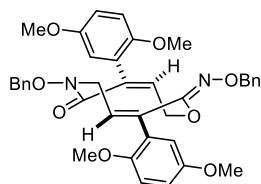

Prepared according to general procedure using corresponding 5-vinyloxazolidine-2,4-dione (73.8 mg, 0.20 mmol). The crude product was purified by flash chromatography on silica gel (eluted with EtOAc : hexanes = 5:1) to give the product **2t** as white solid, 32.4 mg, 50% yield, m.p. 79.9 – 80.4 °C.

**<sup>1</sup>H NMR (400 MHz, CDCl<sub>3</sub>)** δ 7.52 – 7.46 (m, 2H), 7.33 – 7.30 (m, 3H), 7.26 – 7.14 (m, 5H), 6.96 – 6.74 (m, 6H), 6.46 – 6.39 (m, 1H), 6.32 (dd, *J* = 10.8, 5.6 Hz, 1H), 5.11 – 5.01 (m, 3H), 4.98 – 4.79 (m, 4H), 3.97 (dd, *J* = 15.6, 5.6 Hz, 1H), 3.79 (s, 3H), 3.74 (d, *J* = 7.0 Hz, 6H), 3.63 (s, 3H).

**<sup>13</sup>C NMR (101 MHz, CDCl<sub>3</sub>)** δ 166.8, 154.3, 154.0, 153.5, 151.3, 150.9, 139.7, 137.9, 135.5, 133.1, 131.5, 129.6, 128.8, 128.6, 128.4, 128.3, 128.0, 127.7, 127.6, 127.0, 116.0, 115.7, 115.3, 114.3, 112.4, 112.2, 76.6, 76.5, 67.6, 56.4, 56.3, 56.0, 55.8, 49.3.

**HRMS (ESI)** calcd. for C<sub>38</sub>H<sub>39</sub>N<sub>2</sub>O<sub>8</sub> [M + H]<sup>+</sup> 651.2701; found: 651.2704.

### (3*Z*,8*Z*,10*E*)-6-(benzyloxy)-10-((benzyloxy)imino)-4,9-di(naphthalen-1-yl)-7,10-dihydro-2*H*-1,6-oxazecin-5(6*H*)-one (**2u**)

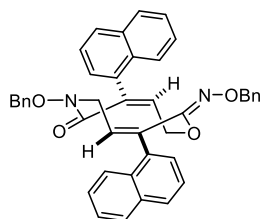

Prepared according to general procedure using corresponding 5-vinyloxazolidine-2,4-dione (71.8 mg, 0.20 mmol). The crude product was purified by flash chromatography on silica gel (eluted with EtOAc : hexanes = 5:1) to give the product **2a** as yellow oil, 18.6 mg, 30% yield.

**<sup>1</sup>H NMR (400 MHz, CDCl<sub>3</sub>)** δ 8.45 – 8.35 (m, 1H), 8.16 (d, *J* = 8.4 Hz, 1H), 7.96 – 7.87 (m, 2H), 7.85 – 7.82 (m, 2H), 7.62 – 7.38 (m, 9H), 7.36 – 7.27 (m, 4H), 7.25 – 7.21 (m, 1H), 7.15 (dd, *J* = 8.3, 6.7 Hz, 2H), 7.08 (d, *J* = 7.2 Hz, 2H), 6.56 (dd, *J* = 10.2, 4.9 Hz, 1H), 6.36 (dd, *J* = 10.9, 4.6 Hz, 1H), 5.26 – 5.13 (m, 3H), 5.03 – 4.85 (m, 2H), 4.83 – 4.71 (m, 2H), 3.57 (dd, *J* = 14.5, 4.9 Hz, 1H).

**<sup>13</sup>C NMR (101 MHz, CDCl<sub>3</sub>)** δ 168.9, 154.2, 141.2, 137.8, 135.2, 134.7, 134.4, 134.2, 134.1, 134.0, 131.6, 131.3, 130.7, 129.9, 129.6, 129.4, 129.2, 129.0, 128.9, 128.8, 128.7, 128.6, 128.5, 128.4, 128.3, 128.2, 128.1, 128.0, 127.3, 127.1, 126.7, 126.5, 126.4, 126.0, 125.5, 125.4, 125.3, 125.2, 77.4, 76.3, 67.7, 49.2.

**HRMS (ESI)** calcd. for C<sub>42</sub>H<sub>34</sub>N<sub>2</sub>O<sub>4</sub>K [M + K]<sup>+</sup> 669.2150; found: 669.2148.

#### 4. Scale-up reaction for the synthesis of 2a.

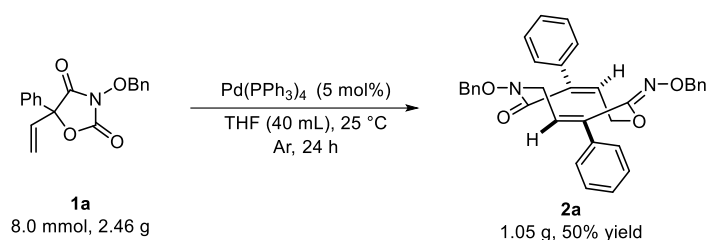

In an ordinary vial equipped with a magnetic stirring bar,  $\text{Pd}(\text{PPh}_3)_4$  (5 mol%), **1a** (8.0 mol, 2.46 g) and dry THF (40 mL). The reaction stirred at rt under argon atmosphere for 24 h. The reaction mixture was directly purified by alumina column chromatography (ethyl acetate/petroleum ether = 1:20) to afford the desired **2a** with 50% yield.

#### 5. Procedures for further transformations.

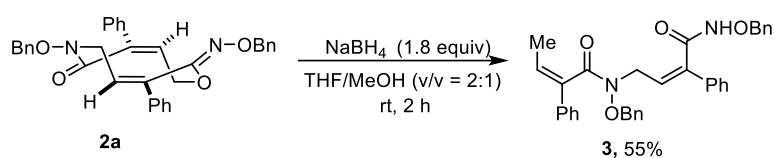

To a stirred solution of **2a** (53.0 mg, 0.1 mmol) in THF/MeOH ( $v/v=2:1$ , 3 mL) were added  $\text{NaBH}_4$  (68 mg, 1.8 eq). The resultant reaction mixture was stirred at rt for 2 h. After the reaction was finished, the mixture was poured into water (3 mL), and extracted with EtOAc (3  $\times$  5 mL). The combined organic layers were further washed with aqueous sodium bicarbonate (2  $\times$  5 mL), brine and dried over  $\text{Na}_2\text{SO}_4$ , and concentrated under reduced pressure. The pure product **3** was isolated by flash chromatography: 29.2 mg, 55% yield.

#### (Z)-N-(benzyloxy)-4-((Z)-N-(benzyloxy)-2-phenylbut-2-enamido)-2-phenylbut-2-enamide (**3**)

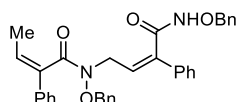

It was purified by flash chromatography (petroleum ether/ethyl acetate = 3:1) to give the product **3** as colorless oil, 29.2 mg, 55% yield.

$^1\text{H NMR}$  (400 MHz,  $\text{CDCl}_3$ )  $\delta$  10.58 (s, 1H), 7.52 – 7.47 (m, 2H), 7.40 – 7.28 (m, 14H), 7.27 – 7.18 (m, 2H), 7.14 (d,  $J = 6.6$  Hz, 2H), 6.21 (q,  $J = 7.2$  Hz, 1H), 5.99 (t,  $J = 7.7$  Hz, 1H), 5.06 (s, 2H), 4.56 (s, 2H), 4.32 (d,  $J = 7.8$  Hz, 2H), 1.87 (d,  $J = 7.2$  Hz, 3H).

$^{13}\text{C NMR}$  (101 MHz,  $\text{CDCl}_3$ )  $\delta$  172.8, 165.5, 139.1, 137.4, 136.5, 136.0, 135.5, 133.9, 129.4, 129.4, 129.2, 129.1, 129.0, 128.9, 128.8, 128.7, 128.6, 127.9, 126.7, 126.6, 125.5, 124.1, 78.2, 77.6, 48.3, 16.0.

HRMS (ESI) calcd. for  $\text{C}_{34}\text{H}_{33}\text{N}_2\text{O}_4$   $[\text{M} + \text{H}]^+$  533.2435; found: 533.2444.

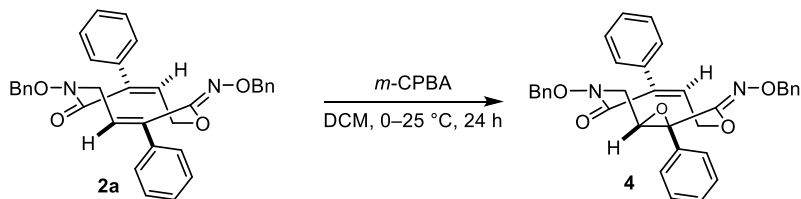

To a stirred solution of **2a** (53.0 mg, 0.1 mmol) in DCM (1 mL) were added  $m$ -chloroperbenzoic acid (86.0 mg, 0.5 mmol) under ice bath. The resultant reaction mixture was stirred at 25 °C for 24 h. After the reaction was finished, the mixture was poured into water (3 mL), and extracted with EtOAc

(3 × 5 mL). The combined organic layers were further washed with aqueous sodium bicarbonate (2 × 5 mL), brine and dried over Na<sub>2</sub>SO<sub>4</sub>, and concentrated under reduced pressure. The pure product **4** was isolated by flash chromatography: 34.2 mg, 63% yield.

**(3Z,8Z,10Z)-6-methoxy-10-(methoxyimino)-4,9-diphenyl-7,10-dihydro-2H-1,6-oxazecin-5(6H)-one**  
**(4)**

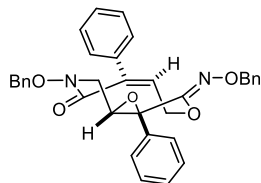

It was purified by flash chromatography (petroleum ether/ethyl acetate = 5:1) to give the product **4** white solid, 34.2 mg, 63% yield, m.p. 75.2 – 75.8 °C.

**<sup>1</sup>H NMR (400 MHz, CDCl<sub>3</sub>)** δ 7.40 – 7.36 (m, 4H), 7.28 – 7.27(m, 10H), 7.18 – 7.17 (m, 6H), 6.21 (dd, *J* = 8.9, 6.1 Hz, 1H), 5.08 – 5.00 (m, 4H), 4.76 – 4.74 (m, 2H), 3.83 (t, *J* = 6.1 Hz, 1H), 3.59 (d, *J* = 6.0 Hz, 2H).

**<sup>13</sup>C NMR (101 MHz, CDCl<sub>3</sub>)** δ 165.4, 151.4, 141.0, 137.1, 135.0, 134.6, 134.5, 129.8, 129.5, 129.4, 129.3, 129.1, 128.9, 128.8, 128.7, 128.6, 128.2, 127.2, 126.2, 125.6, 76.5, 67.5, 61.3, 59.6, 48.2, 29.8.

**HRMS (ESI)** calcd. for C<sub>34</sub>H<sub>31</sub>N<sub>2</sub>O<sub>5</sub> [M + H]<sup>+</sup> 547.2227; found: 547.2230.

## 6. X-ray crystallographic data of 2a and 4.

Single crystals of compound **2a** were prepared from the mixture solvent of dichloromethane and EtOH. A suitable crystal was selected for structure determination on a Xcalibur, Eos, Gemini diffractometer. The crystal was kept at 293(2) K during data collection. Using Olex2<sup>[1]</sup>, the structure was solved with the ShelXS<sup>[2]</sup> structure solution program using Direct Methods and refined with the ShelXL<sup>[3]</sup> refinement package using Least Squares minimisation.

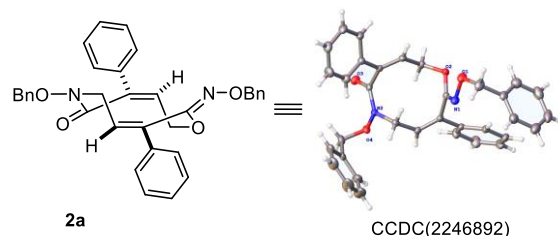

|                                    |                                                               |
|------------------------------------|---------------------------------------------------------------|
| Identification code                | <b>2a</b>                                                     |
| Empirical formula                  | C <sub>34</sub> H <sub>30</sub> N <sub>2</sub> O <sub>4</sub> |
| Formula weight                     | 530.60                                                        |
| Temperature/K                      | 296.15                                                        |
| Crystal system                     | monoclinic                                                    |
| Space group                        | P2 <sub>1</sub> /c                                            |
| a/Å                                | 19.264(5)                                                     |
| b/Å                                | 11.216(3)                                                     |
| c/Å                                | 13.734(4)                                                     |
| α/°                                | 90                                                            |
| β/°                                | 106.847(6)                                                    |
| γ/°                                | 90                                                            |
| Volume/Å <sup>3</sup>              | 2840.2(13)                                                    |
| Z                                  | 4                                                             |
| ρ <sub>calc</sub> /cm <sup>3</sup> | 1.241                                                         |
| μ/mm <sup>-1</sup>                 | 0.082                                                         |
| F(000)                             | 1120.0                                                        |
| Crystal size/mm <sup>3</sup>       | 0.14 × 0.11 × 0.09                                            |
| Radiation                          | MoKα (λ = 0.71073)                                            |
| 2θ range for data collection/°     | 4.868 to 50.108                                               |
| Index ranges                       | -22 ≤ h ≤ 20, -11 ≤ k ≤ 13, -16 ≤ l ≤ 16                      |
| Reflections collected              | 31215                                                         |
| Independent reflections            | 4983 [R <sub>int</sub> = 0.1080, R <sub>sigma</sub> = 0.1015] |
| Data/restraints/parameters         | 4983/0/361                                                    |
| Goodness-of-fit on F <sup>2</sup>  | 0.996                                                         |
| Final R indexes [I ≥ 2σ (I)]       | R <sub>1</sub> = 0.0567, wR <sub>2</sub> = 0.1136             |

|                                                |                                  |
|------------------------------------------------|----------------------------------|
| Final R indexes [all data]                     | $R_1 = 0.1501$ , $wR_2 = 0.1475$ |
| Largest diff. peak/hole / $e \text{ \AA}^{-3}$ | 0.14/-0.20                       |

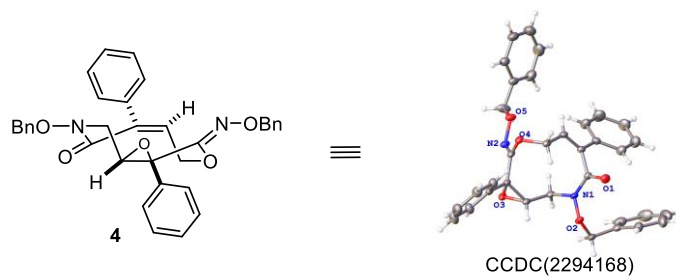

|                                                |                                                                    |
|------------------------------------------------|--------------------------------------------------------------------|
| Identification code                            | <b>4</b>                                                           |
| Empirical formula                              | $C_{34}H_{30}N_2O_5$                                               |
| Formula weight                                 | 546.60                                                             |
| Temperature/K                                  | 294.39(10)                                                         |
| Crystal system                                 | triclinic                                                          |
| Space group                                    | P-1                                                                |
| a/ $\text{\AA}$                                | 13.3940(2)                                                         |
| b/ $\text{\AA}$                                | 14.6109(5)                                                         |
| c/ $\text{\AA}$                                | 15.1875(2)                                                         |
| $\alpha/^\circ$                                | 96.358(2)                                                          |
| $\beta/^\circ$                                 | 90.1140(10)                                                        |
| $\gamma/^\circ$                                | 102.034(2)                                                         |
| Volume/ $\text{\AA}^3$                         | 2888.01(12)                                                        |
| Z                                              | 4                                                                  |
| $\rho_{\text{calc}}/\text{g/cm}^3$             | 1.257                                                              |
| $\mu/\text{mm}^{-1}$                           | 0.685                                                              |
| F(000)                                         | 1152.0                                                             |
| Crystal size/ $\text{mm}^3$                    | $0.16 \times 0.12 \times 0.11$                                     |
| Radiation                                      | Cu $K\alpha$ ( $\lambda = 1.54184$ )                               |
| $2\theta$ range for data collection/ $^\circ$  | 5.858 to 133.198                                                   |
| Index ranges                                   | $-15 \leq h \leq 13$ , $-17 \leq k \leq 17$ , $-18 \leq l \leq 18$ |
| Reflections collected                          | 40872                                                              |
| Independent reflections                        | 10168 [ $R_{\text{int}} = 0.0524$ , $R_{\text{sigma}} = 0.0391$ ]  |
| Data/restraints/parameters                     | 10168/0/739                                                        |
| Goodness-of-fit on $F^2$                       | 1.553                                                              |
| Final R indexes [ $I \geq 2\sigma(I)$ ]        | $R_1 = 0.1100$ , $wR_2 = 0.3414$                                   |
| Final R indexes [all data]                     | $R_1 = 0.1169$ , $wR_2 = 0.3487$                                   |
| Largest diff. peak/hole / $e \text{ \AA}^{-3}$ | 0.42/-0.34                                                         |

[1] Dolomanov, O. V.; Bourhis, L. J.; Gildea, R. J.; Howard, J. A. K.; Puschmann, H. *J. Appl. Cryst.* **2009**, *42*, 339-341.

[2] Sheldrick, G. M. *Acta Cryst.* **2008**, A64, 112-122.

[3] Sheldrick, G. M. *Acta Cryst.* **2015**, C71, 3-8.



7.  $^1\text{H}$  NMR,  $^{13}\text{C}$  NMR for compounds 2, 3, and 4.

$^1\text{H}$  NMR (400 MHz,  $\text{CDCl}_3$ ) of 2a

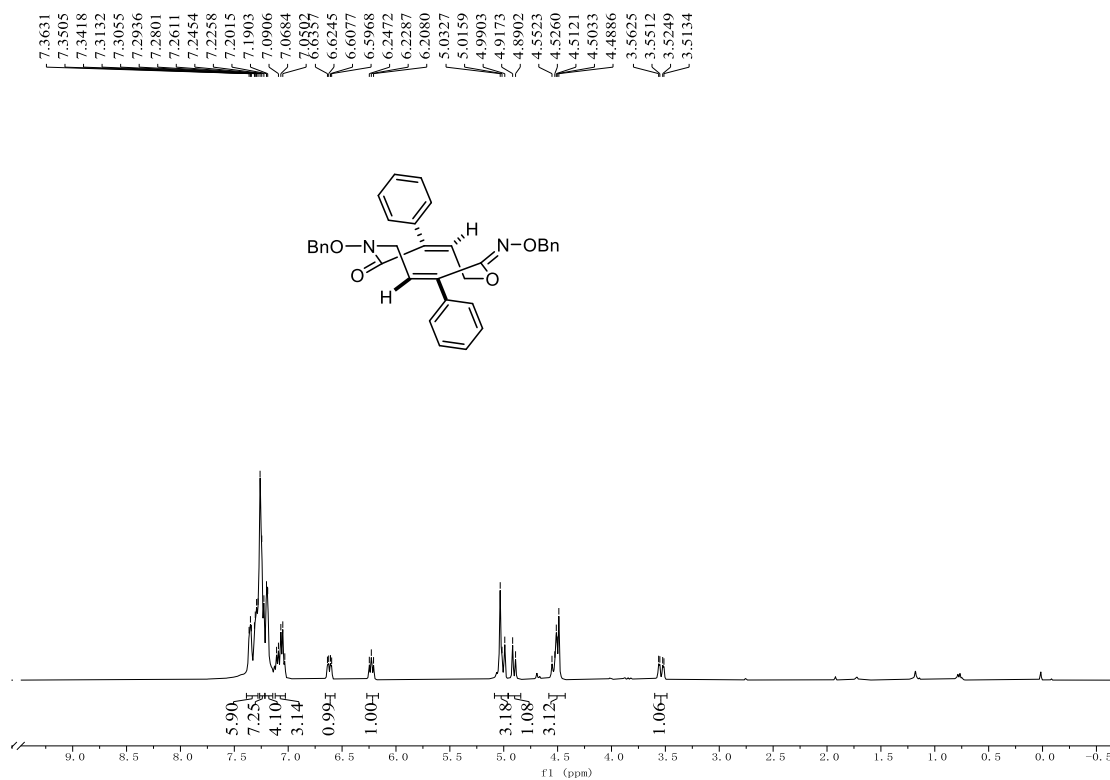

$^{13}\text{C}$  NMR (101 MHz,  $\text{CDCl}_3$ ) of 2a

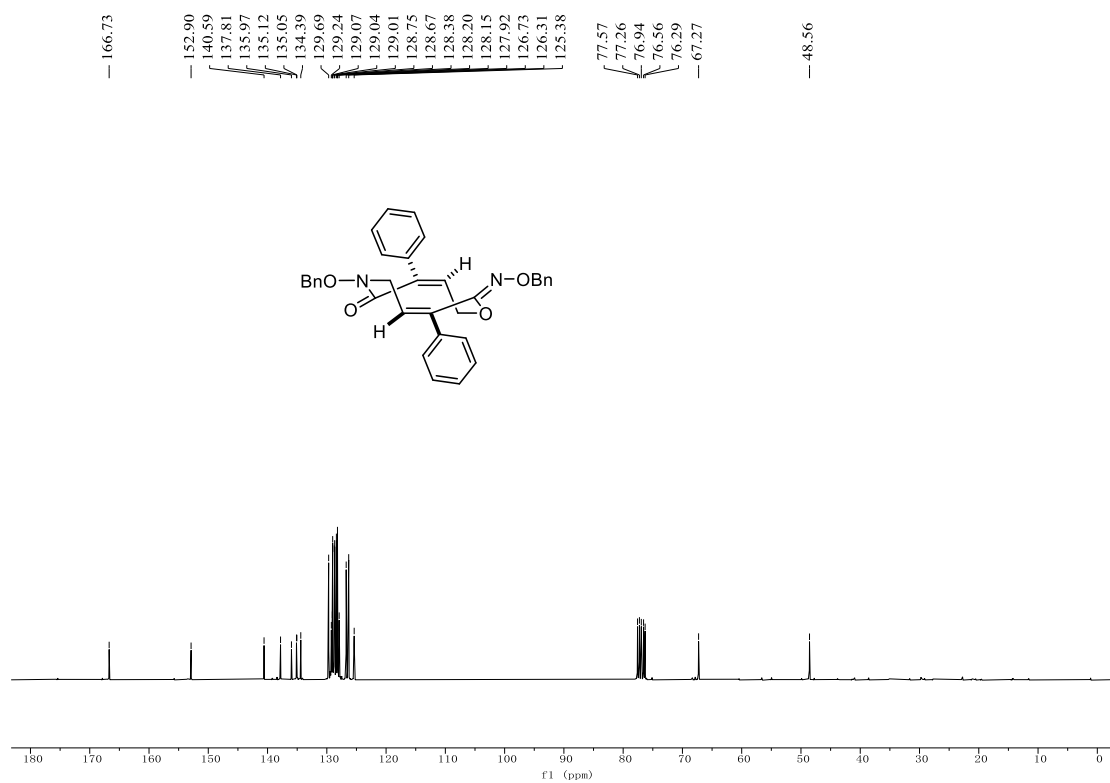

<sup>1</sup>H NMR (400 MHz, CDCl<sub>3</sub>) of **2b**

7.4446  
7.4329  
7.4256  
7.3926  
7.3853  
7.3805  
7.3717  
7.3654  
7.3505  
7.3464  
7.3423  
7.3295  
7.3257  
7.2709  
7.2601  
7.2538  
7.2485  
7.2360  
7.2195  
7.2008  
7.1841  
7.1796  
7.0545  
7.0331  
7.0116  
6.9930  
6.9714  
6.6614  
6.6343  
6.6229  
6.2532  
6.2409  
6.2264  
6.2140  
5.1194  
5.0877  
5.0605  
5.0039  
4.9768  
4.6187  
4.6063  
4.5861  
4.5672  
4.5546  
4.5409  
4.5273  
4.5083  
3.6566  
3.6452  
3.6193  
3.6079

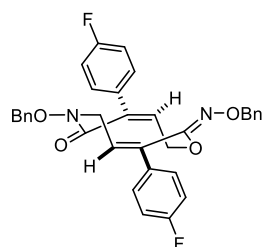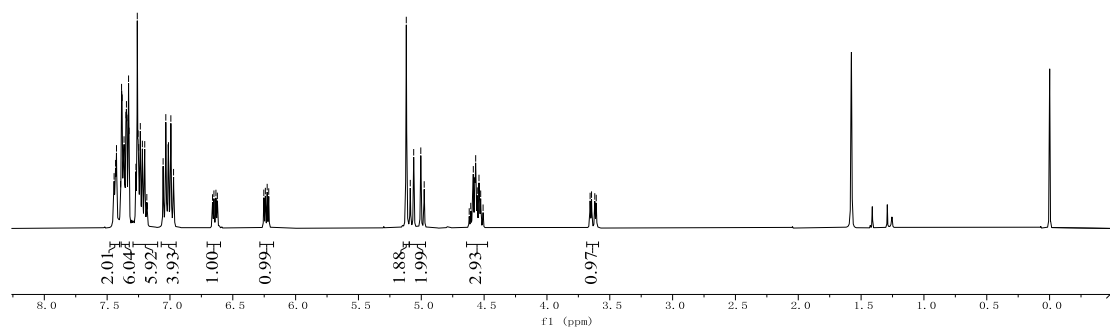

<sup>13</sup>C NMR (101 MHz, CDCl<sub>3</sub>) of **2b**

166.75  
164.63  
164.60  
162.15  
162.12  
152.78  
139.81  
137.77  
134.99  
133.63  
132.08  
132.04  
131.27  
131.24  
129.76  
129.22  
128.80  
128.74  
128.65  
128.50  
128.40  
128.29  
128.21  
128.14  
127.96  
125.30  
116.20  
115.98  
115.95  
115.73  
77.48  
77.16  
76.84  
76.76  
76.38  
47.38

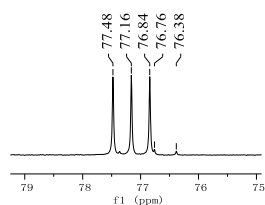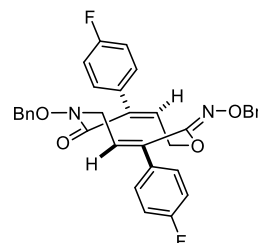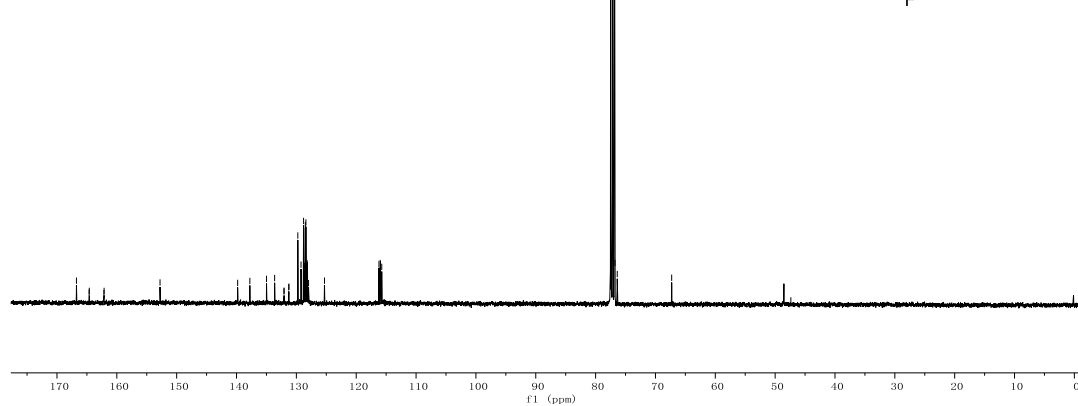

$^{19}\text{F}$  NMR (376 MHz,  $\text{CDCl}_3$ ) of **2b**

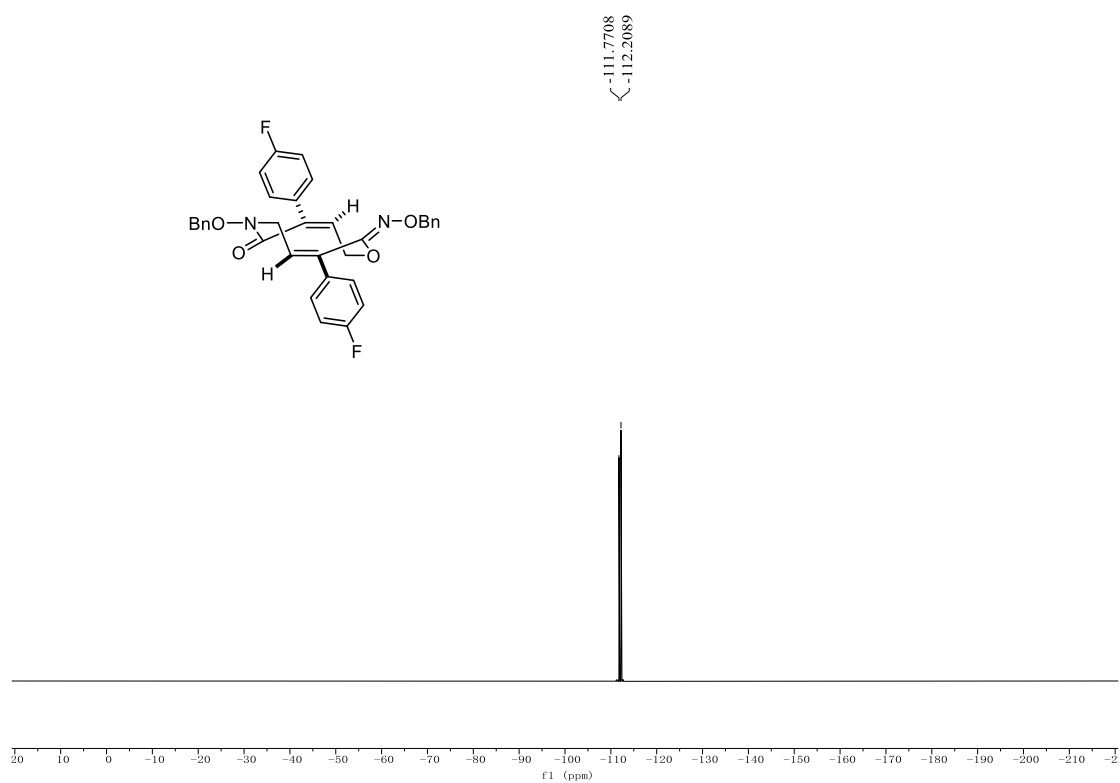

<sup>1</sup>H NMR (400 MHz, CDCl<sub>3</sub>) of **2c**

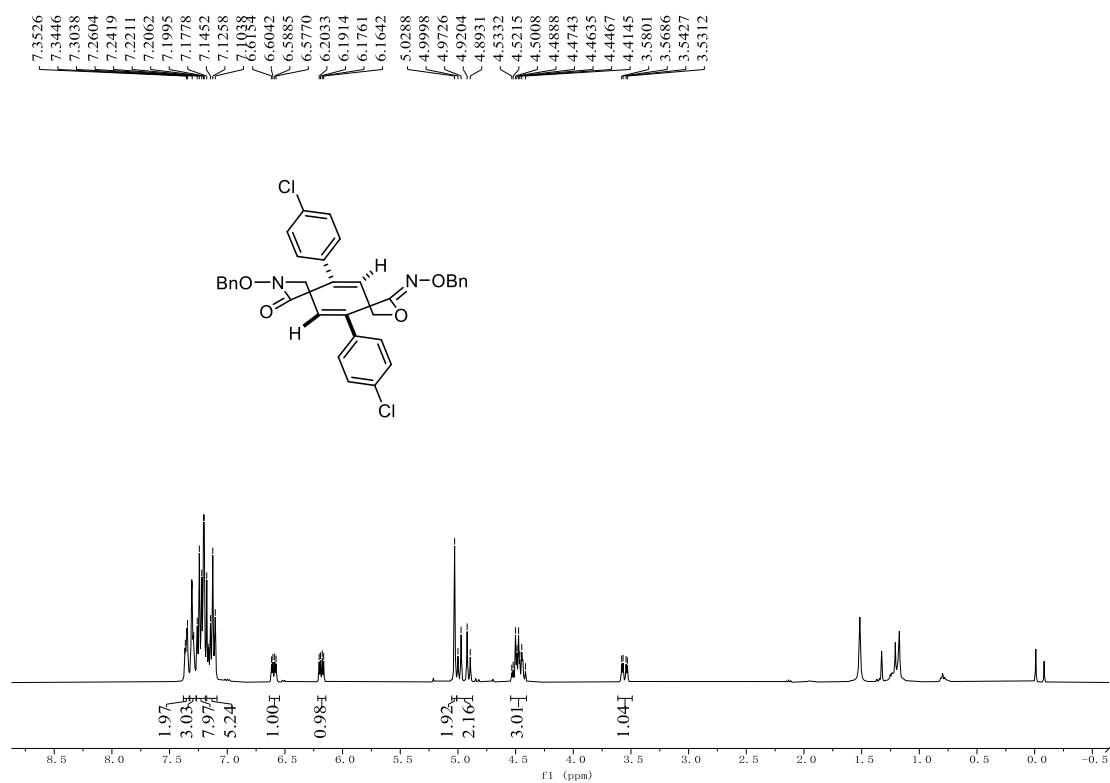

<sup>13</sup>C NMR (101 MHz, CDCl<sub>3</sub>) of **2c**

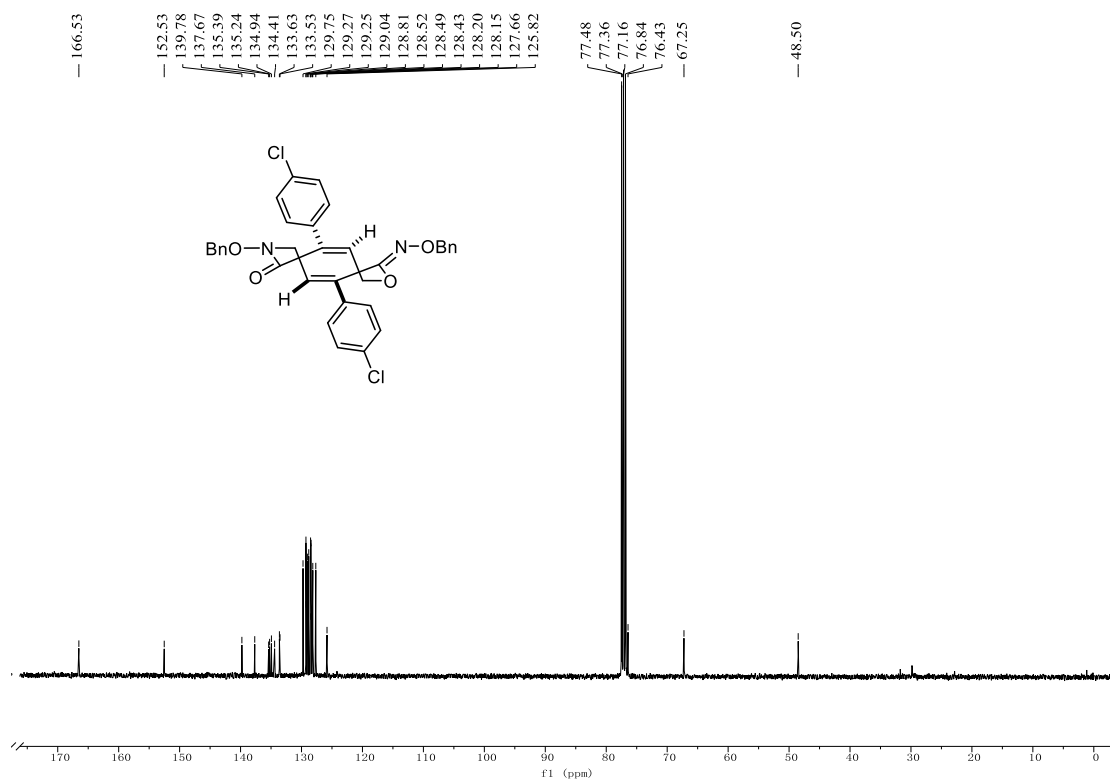

<sup>1</sup>H NMR (400 MHz, CDCl<sub>3</sub>) **2d**

7.4784  
7.4571  
7.4482  
7.4360  
7.4310  
7.4198  
7.4133  
7.3912  
7.3865  
7.3781  
7.3735  
7.3647  
7.3392  
7.3224  
7.3181  
7.2600  
7.2460  
7.2373  
7.2296  
7.2157  
7.2100  
7.1891  
7.1392  
7.1179  
6.7040  
6.6927  
6.6771  
6.6657  
6.2903  
6.2785  
6.2632  
6.2512  
5.1071  
5.0765  
5.0493  
4.9973  
4.9702  
4.6067  
4.5948  
4.5748  
4.5622  
4.5485  
4.5388  
4.5206  
4.5126  
4.4881  
3.6540  
3.6425  
3.6167

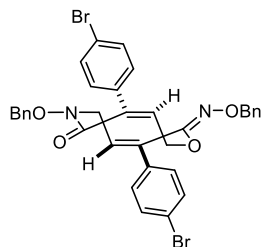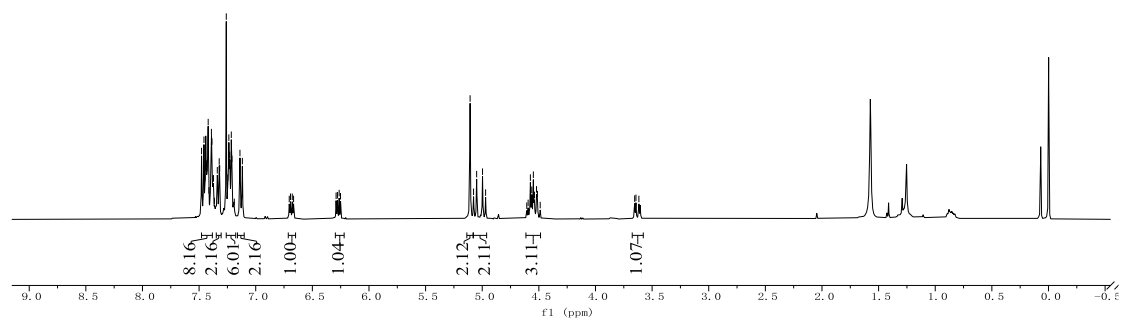

<sup>13</sup>C NMR (101 MHz, CDCl<sub>3</sub>) of **2d**

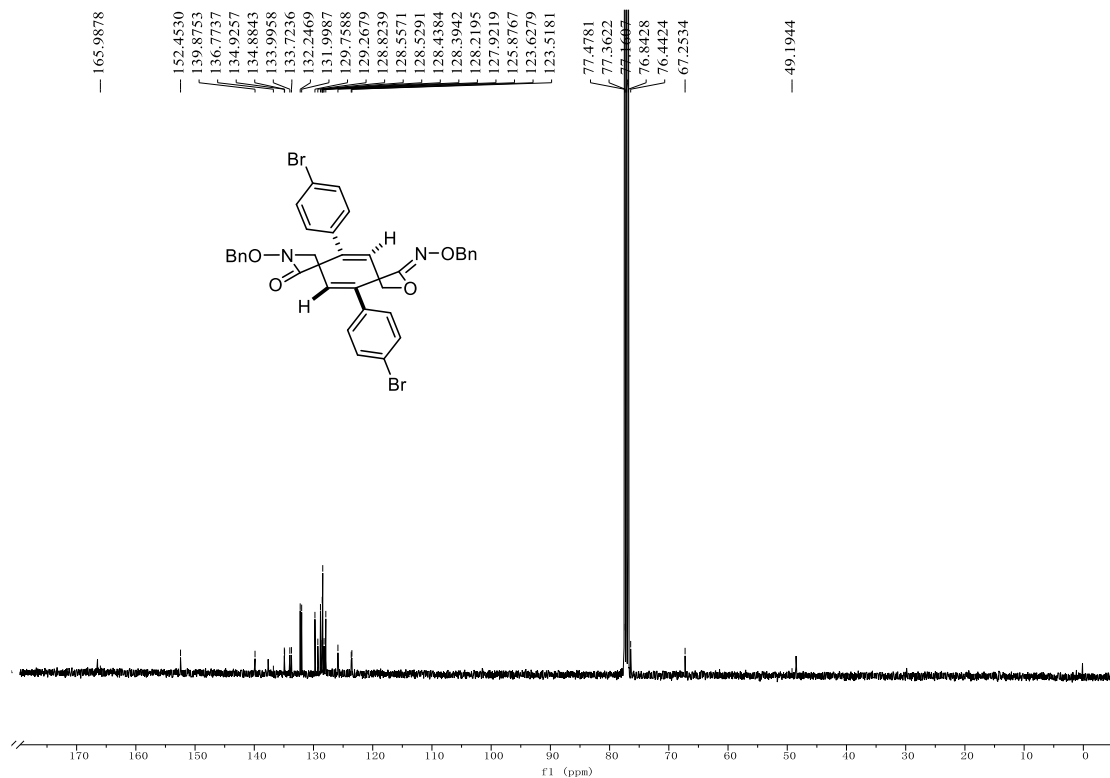

<sup>1</sup>H NMR (400 MHz, CDCl<sub>3</sub>) of 2e

7.4761  
7.4702  
7.4611  
7.4519  
7.3907  
7.3813  
7.3747  
7.3689  
7.3443  
7.3399  
7.3231  
7.2860  
7.2659  
7.2600  
7.2403  
7.2125  
7.2085  
7.2044  
7.1863  
7.1714  
7.1658  
7.1546  
7.1202  
7.1004  
6.6898  
6.6786  
6.6626  
6.6513  
6.3280  
6.3131  
6.2953  
6.2917  
6.2738  
6.2589  
5.1536  
5.1179  
5.0910  
5.0067  
4.9797  
4.6056  
4.5962  
4.5889  
4.5676  
3.6492  
3.6379  
3.6119  
3.6007  
2.4038  
2.3327

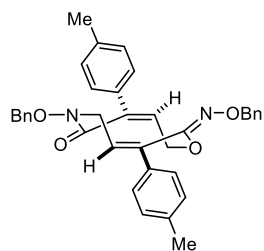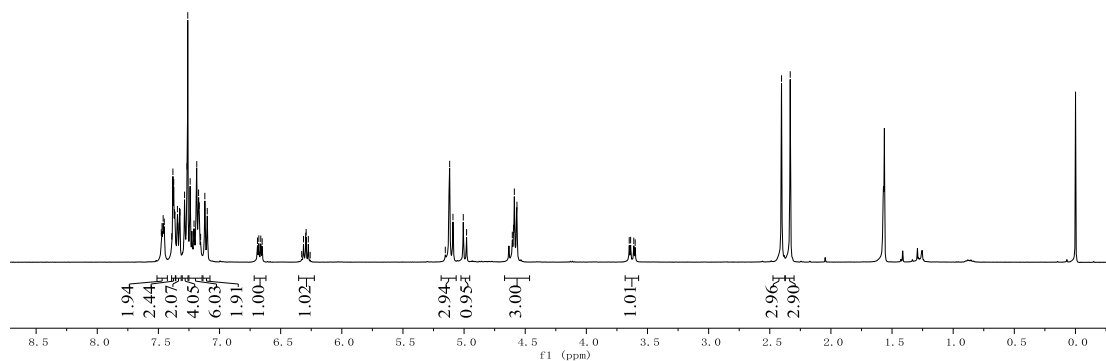

<sup>13</sup>C NMR (101 MHz, CDCl<sub>3</sub>) of 2e

167.03  
152.55  
140.00  
139.39  
139.21  
138.51  
135.86  
134.33  
133.16  
131.87  
129.74  
129.58  
129.22  
129.09  
128.75  
128.45  
128.25  
127.95  
127.22  
126.73  
126.28  
124.16  
77.48  
77.16  
76.84  
76.60  
76.39  
67.42  
48.69  
21.42  
21.35

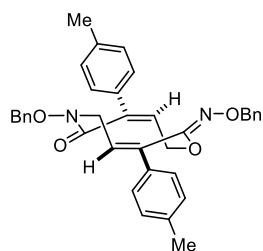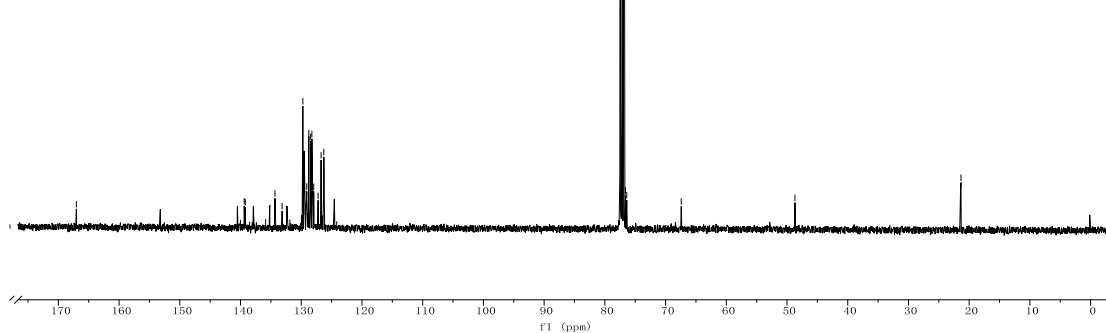

<sup>1</sup>H NMR (400 MHz, CDCl<sub>3</sub>) of **2f**

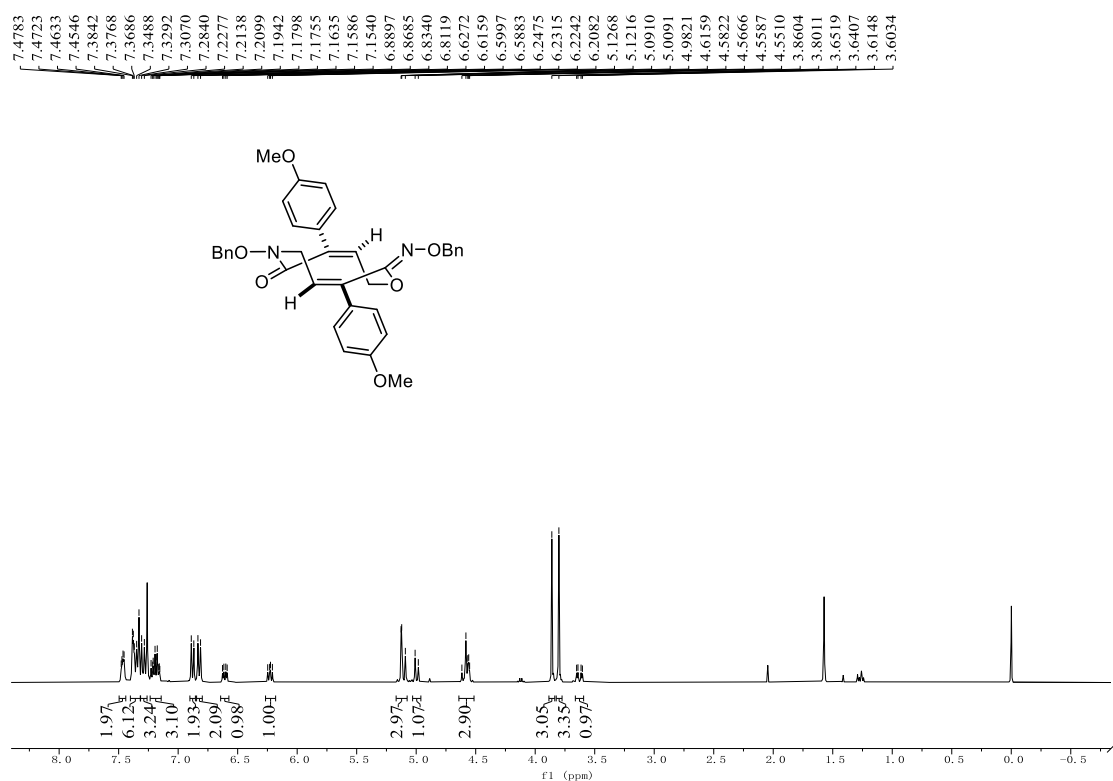

<sup>13</sup>C NMR (101 MHz, CDCl<sub>3</sub>) of **2f**

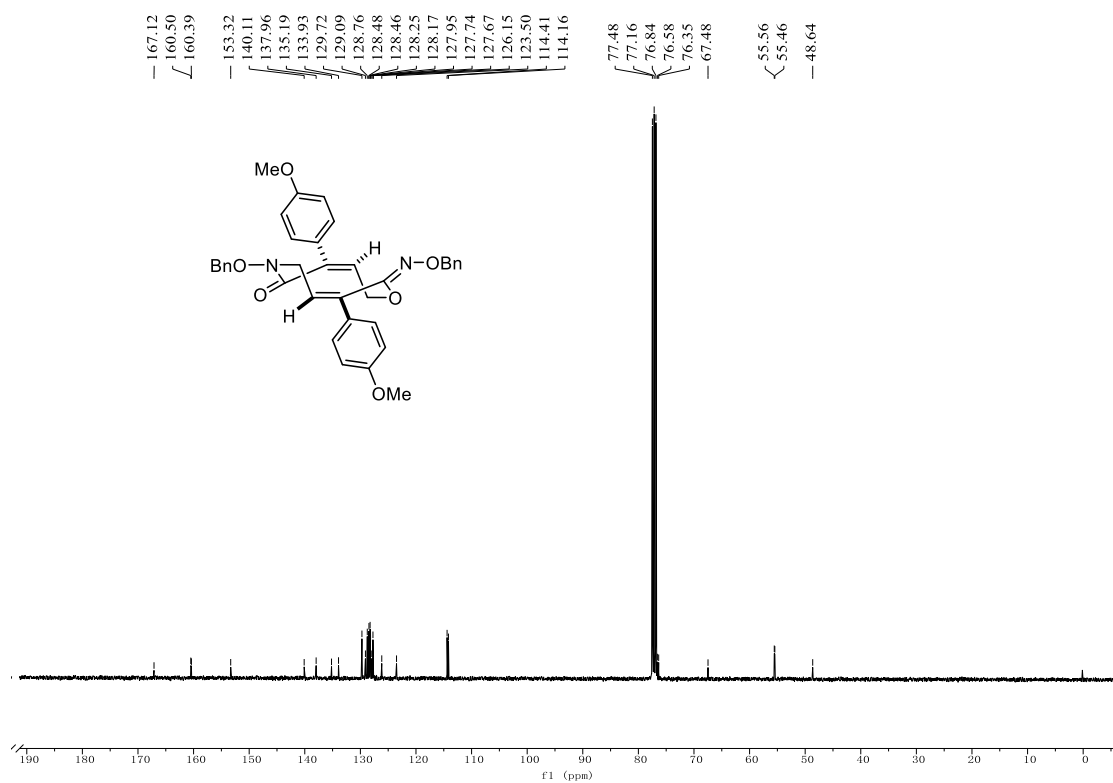

<sup>1</sup>H NMR (400 MHz, CDCl<sub>3</sub>) of **2g**

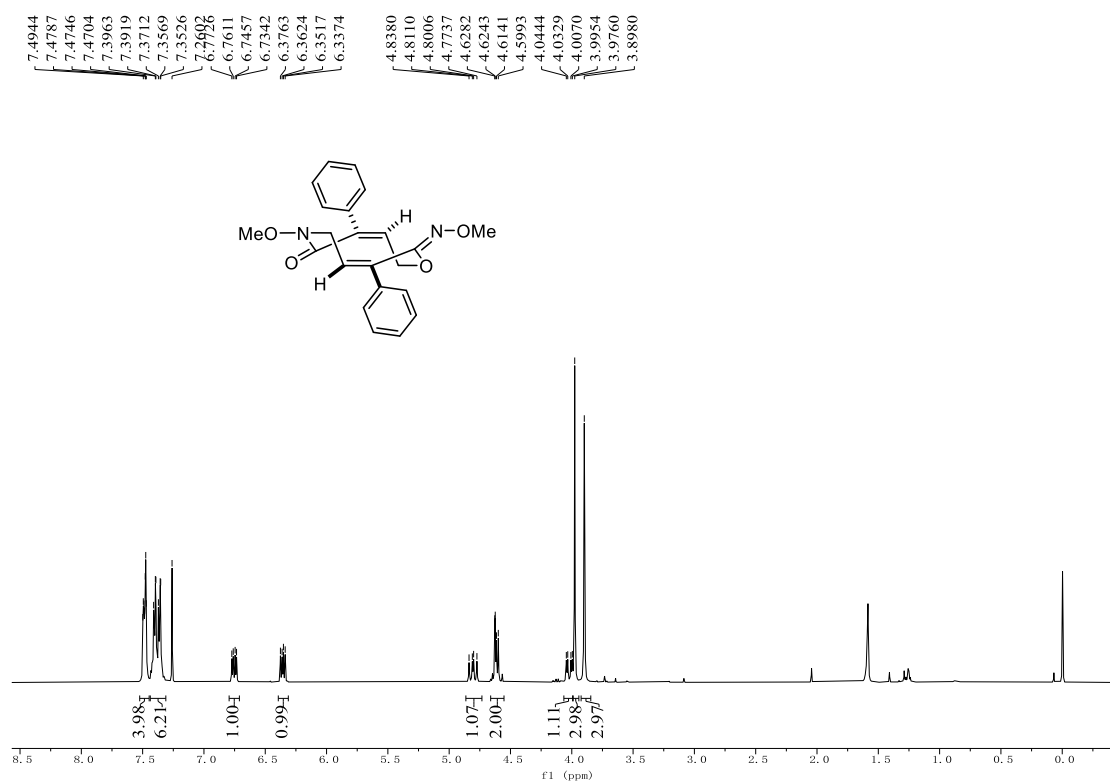

<sup>13</sup>C NMR (101 MHz, CDCl<sub>3</sub>) of **2g**

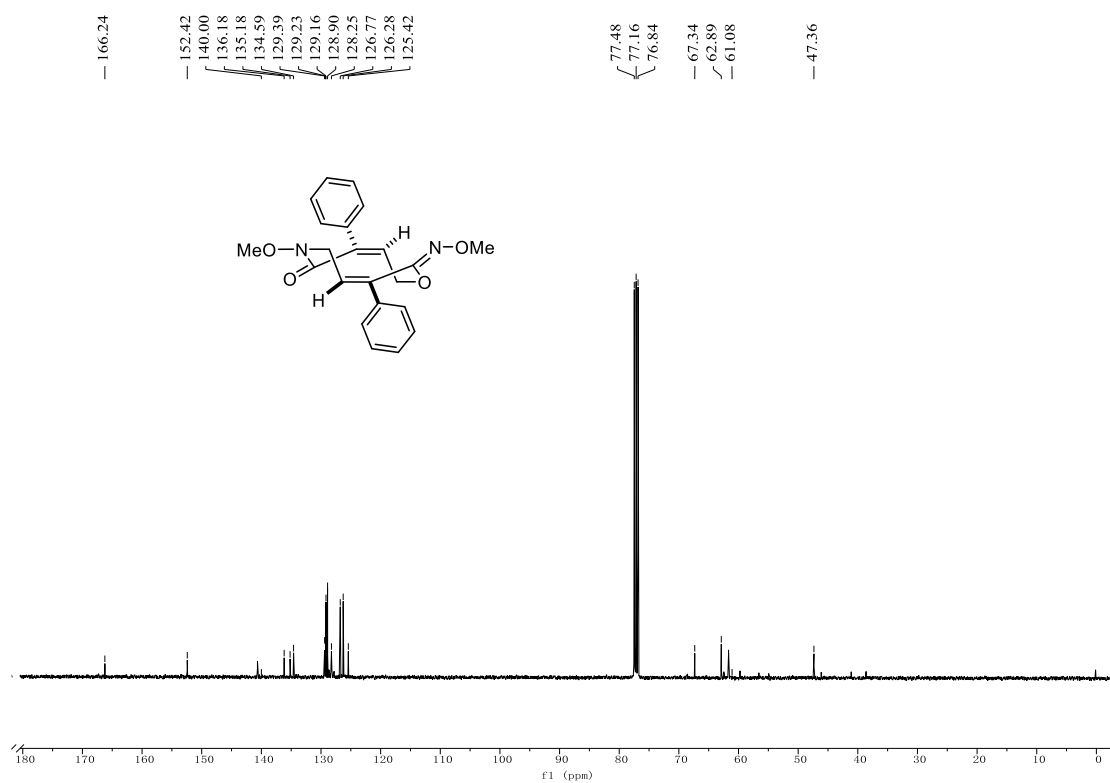



<sup>1</sup>H NMR (400 MHz, CDCl<sub>3</sub>) of **2h**

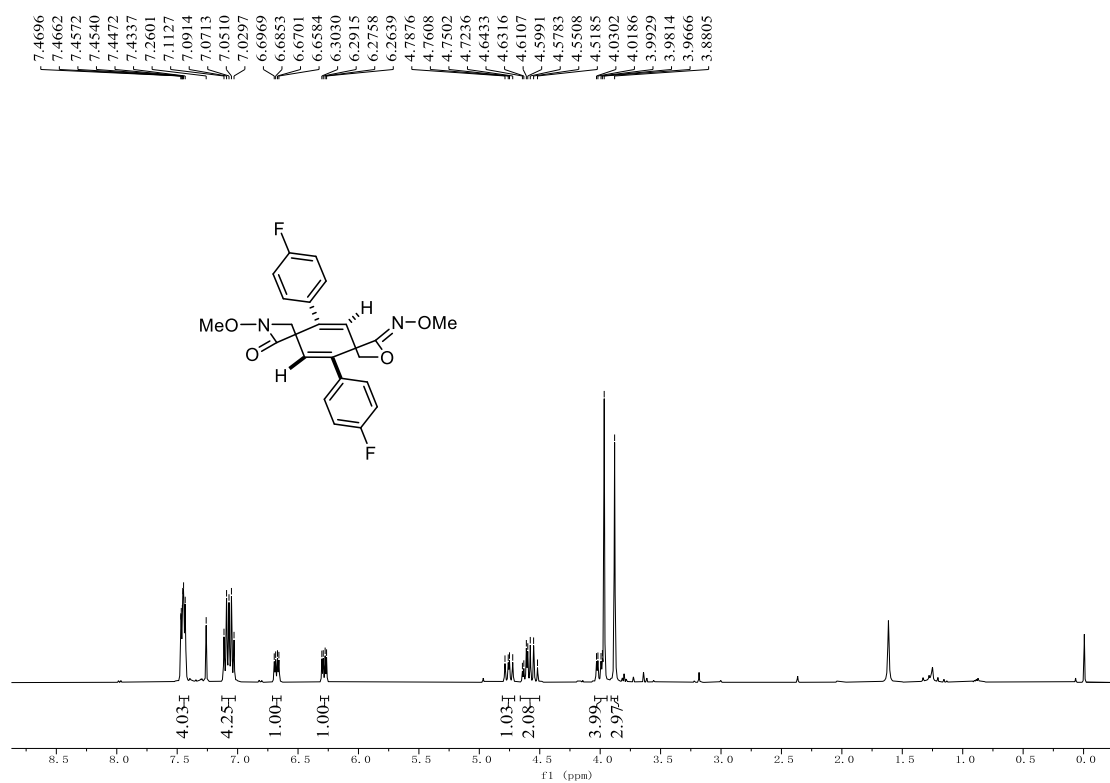

<sup>13</sup>C NMR (101 MHz, CDCl<sub>3</sub>) of **2h**

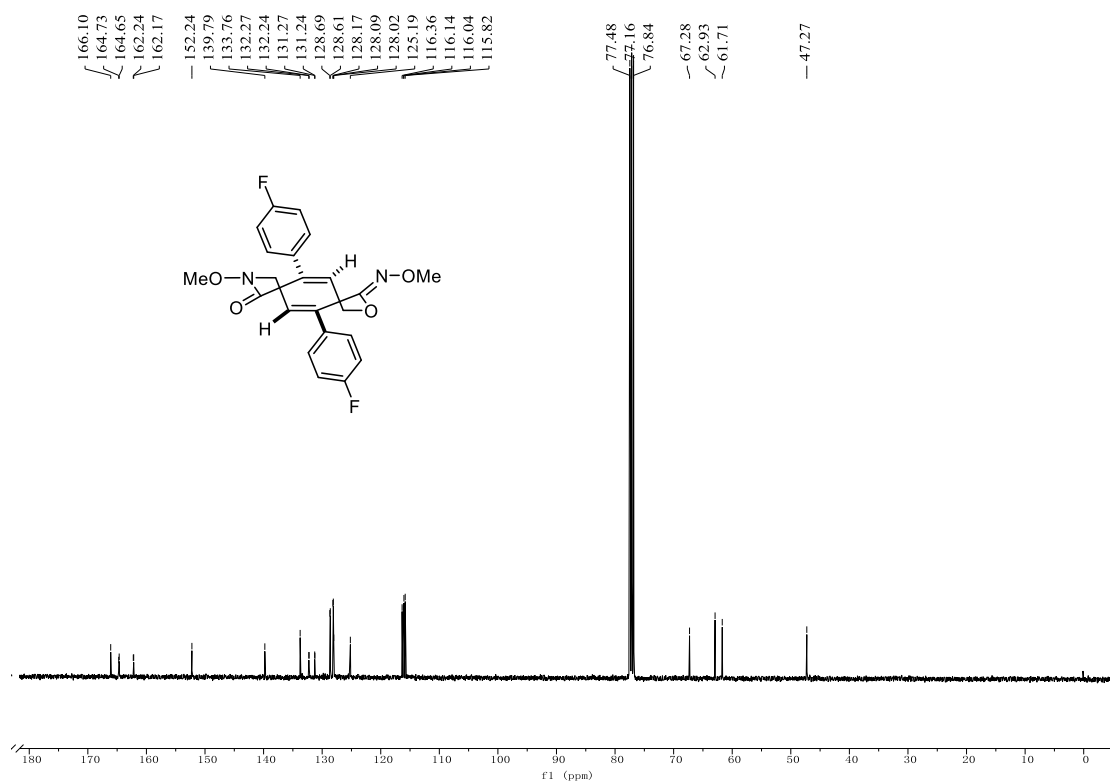

$^{19}\text{F}$  NMR (376 MHz,  $\text{CDCl}_3$ ) of **2h**

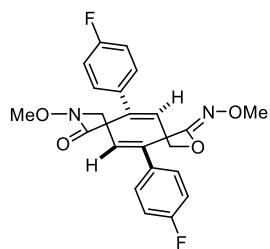

-111.62  
-112.09

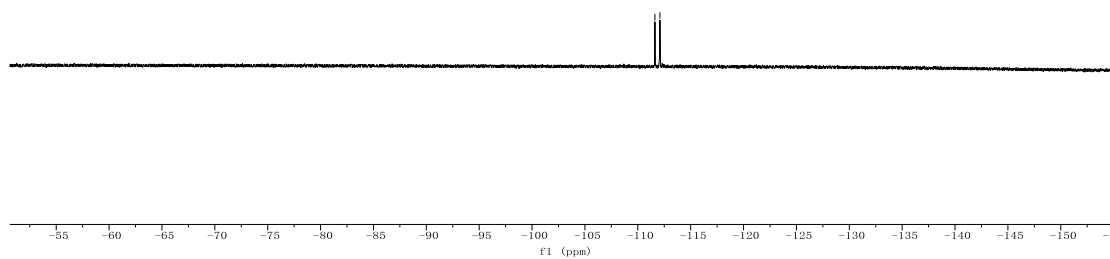

<sup>1</sup>H NMR (400 MHz, CDCl<sub>3</sub>) of **2i**

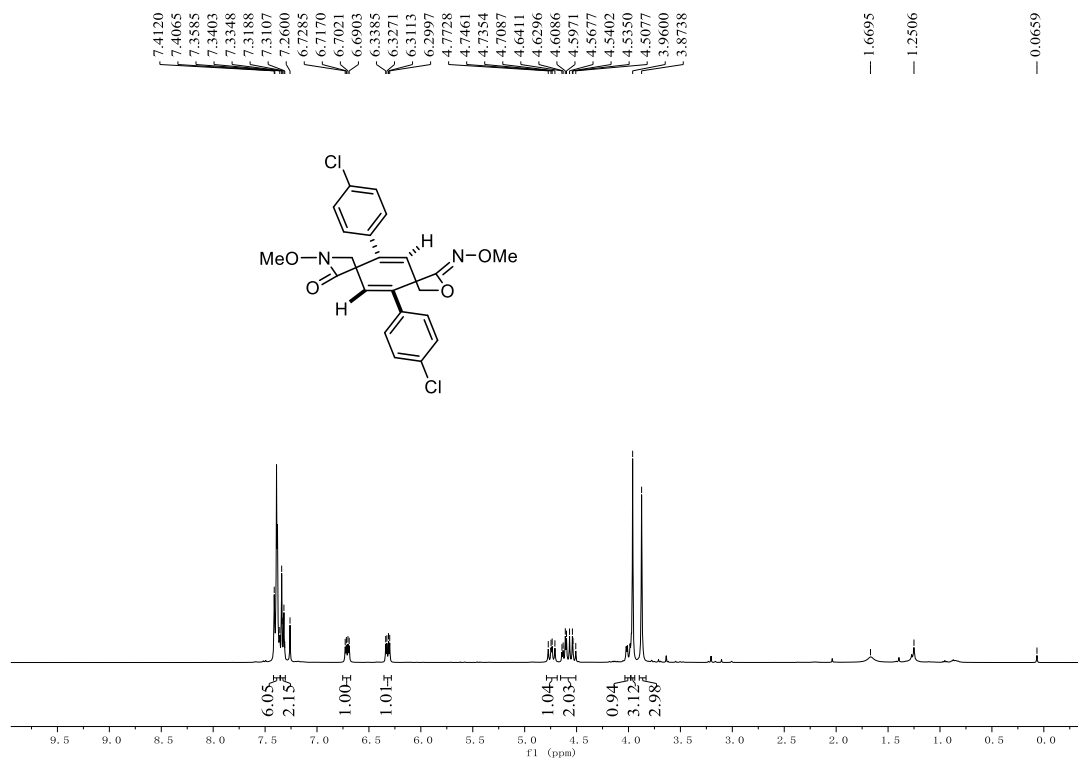

<sup>13</sup>C NMR (101 MHz, CDCl<sub>3</sub>) of **2i**

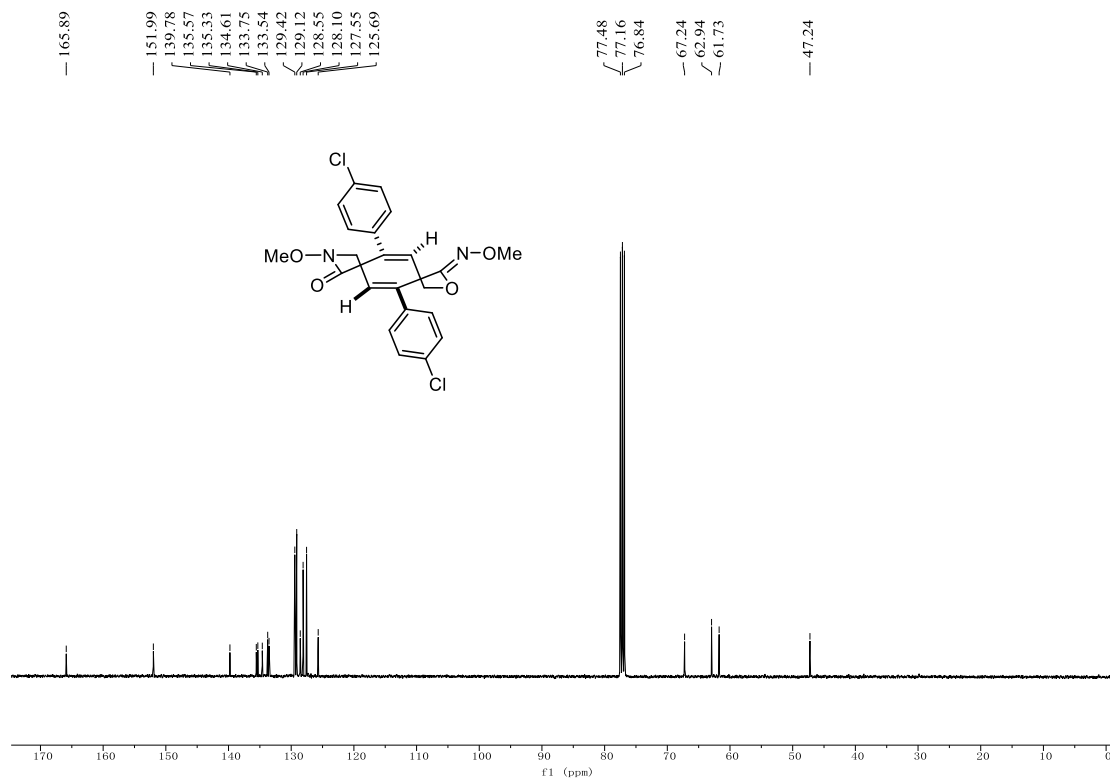

<sup>1</sup>H NMR (400 MHz, CDCl<sub>3</sub>) of **2j**

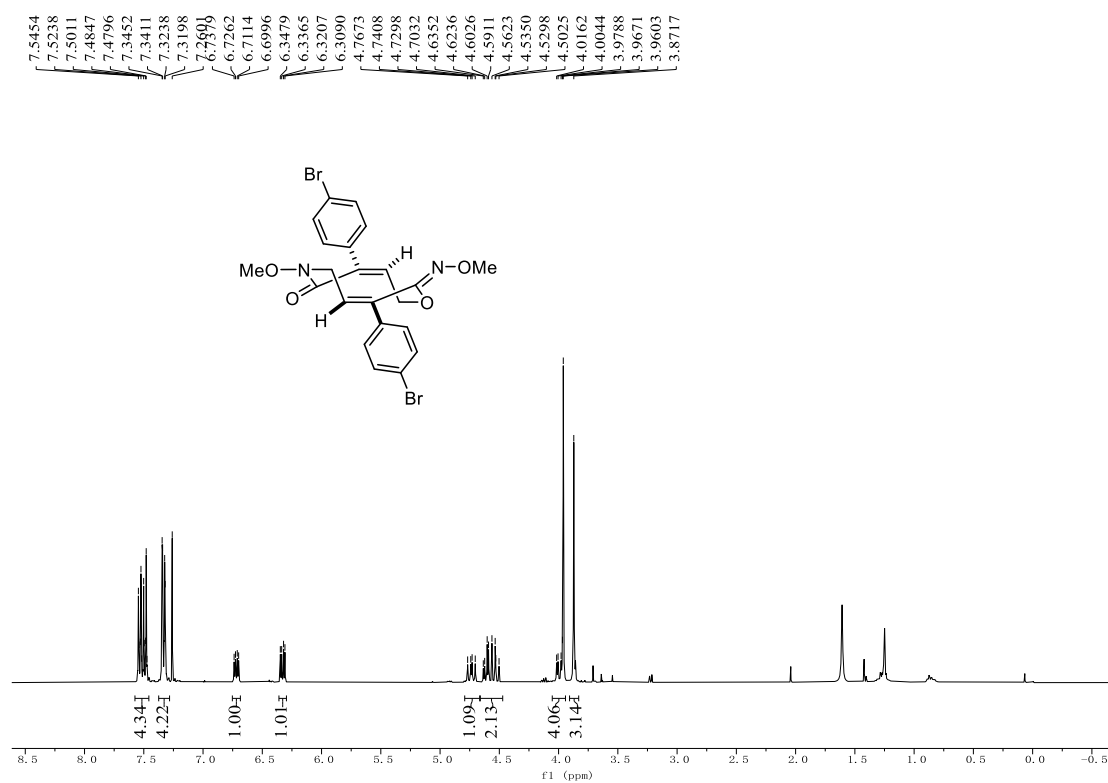

<sup>13</sup>C NMR (101 MHz, CDCl<sub>3</sub>) of **2j**

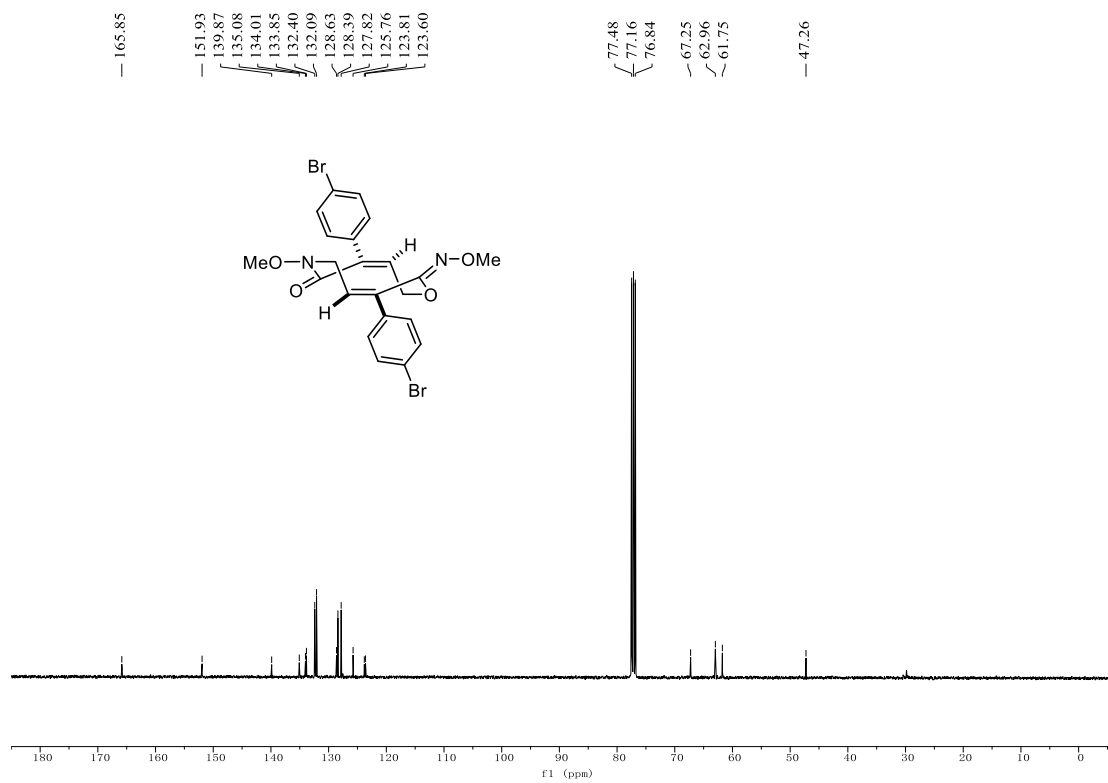

<sup>1</sup>H NMR (400 MHz, CDCl<sub>3</sub>) of **2k**

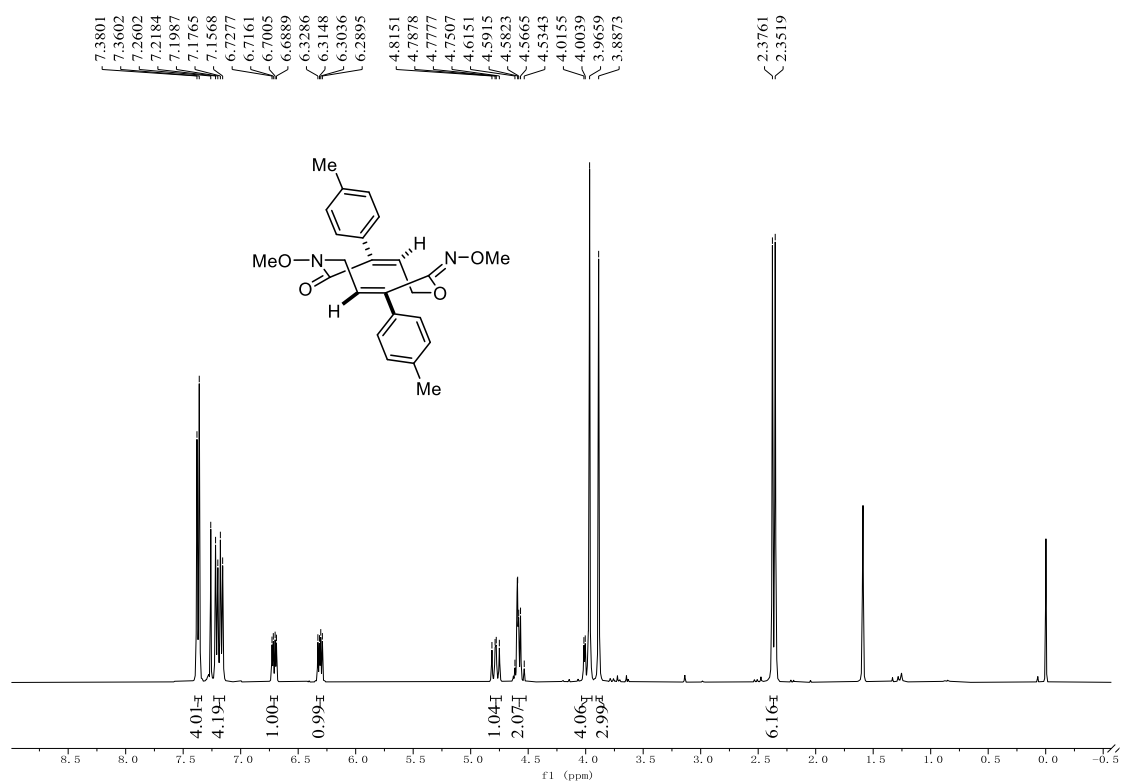

<sup>13</sup>C NMR (101 MHz, CDCl<sub>3</sub>) of **2k**

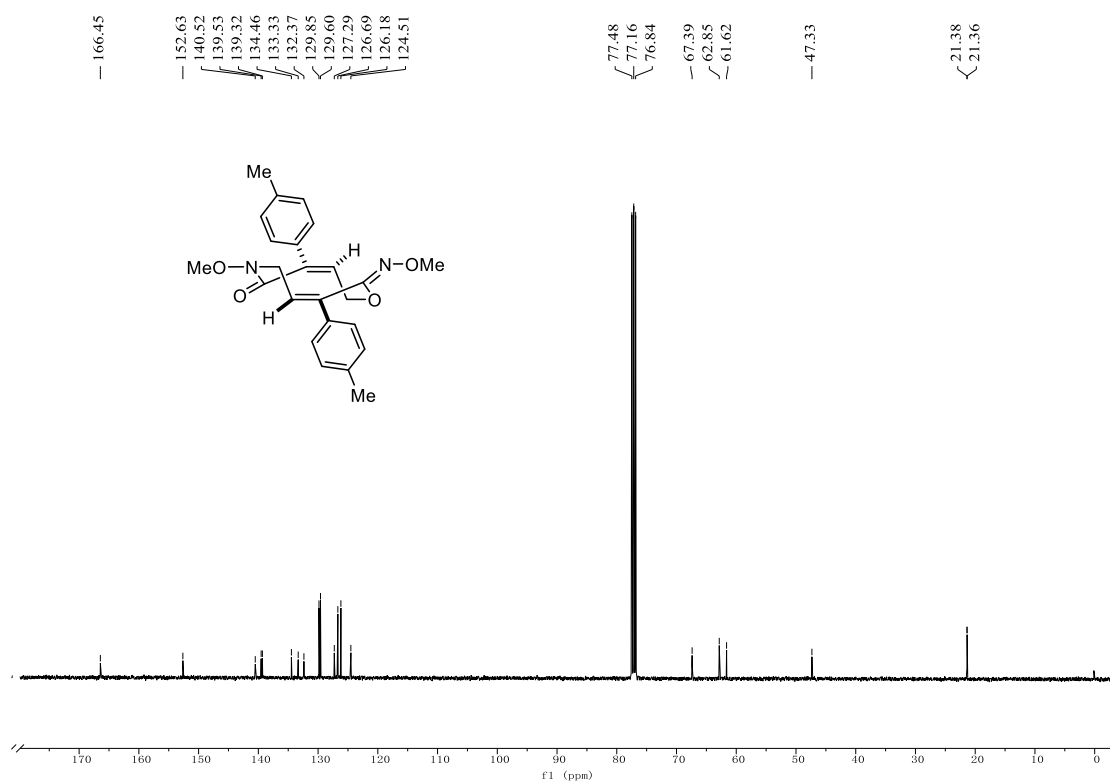

<sup>1</sup>H NMR (400 MHz, CDCl<sub>3</sub>) of **2I**

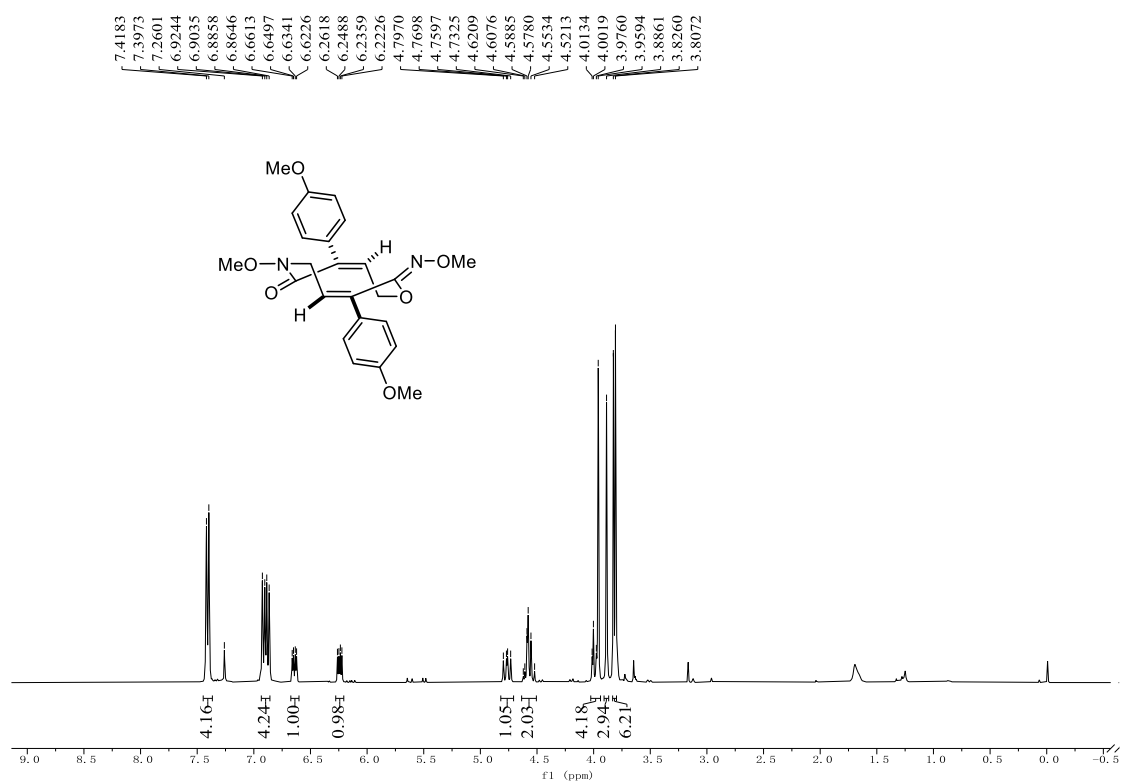

<sup>13</sup>C NMR (101 MHz, CDCl<sub>3</sub>) of **2I**

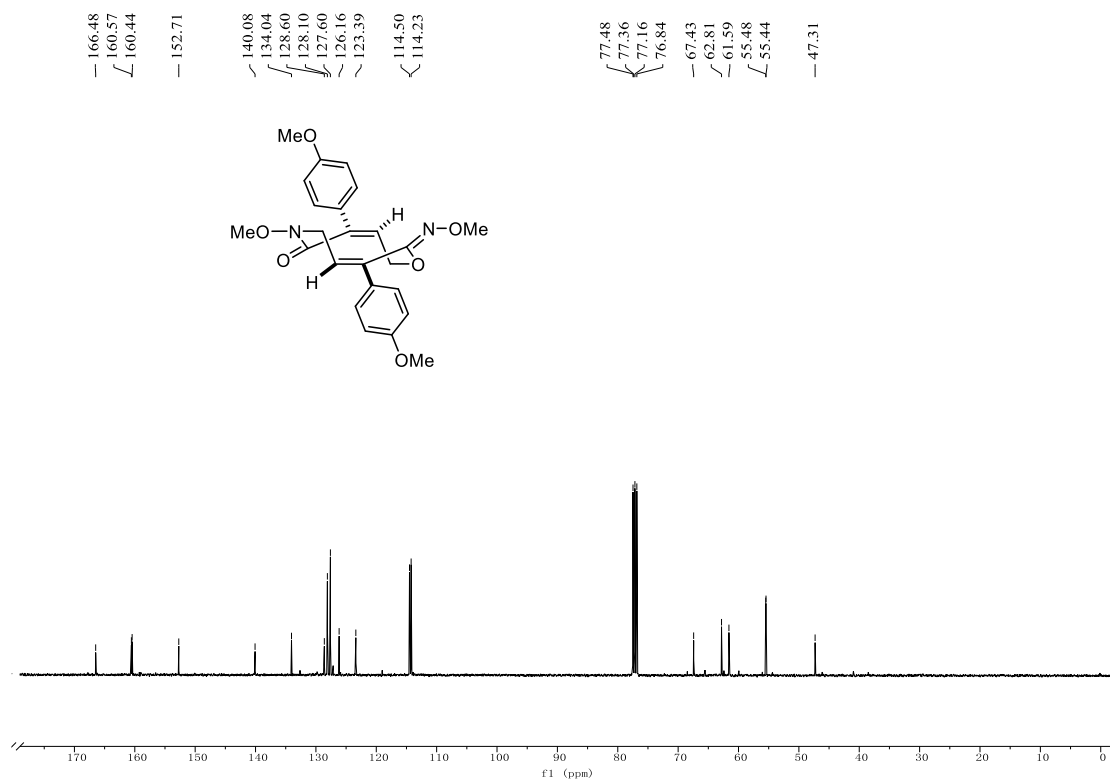

<sup>1</sup>H NMR (400 MHz, CDCl<sub>3</sub>) of **2m**

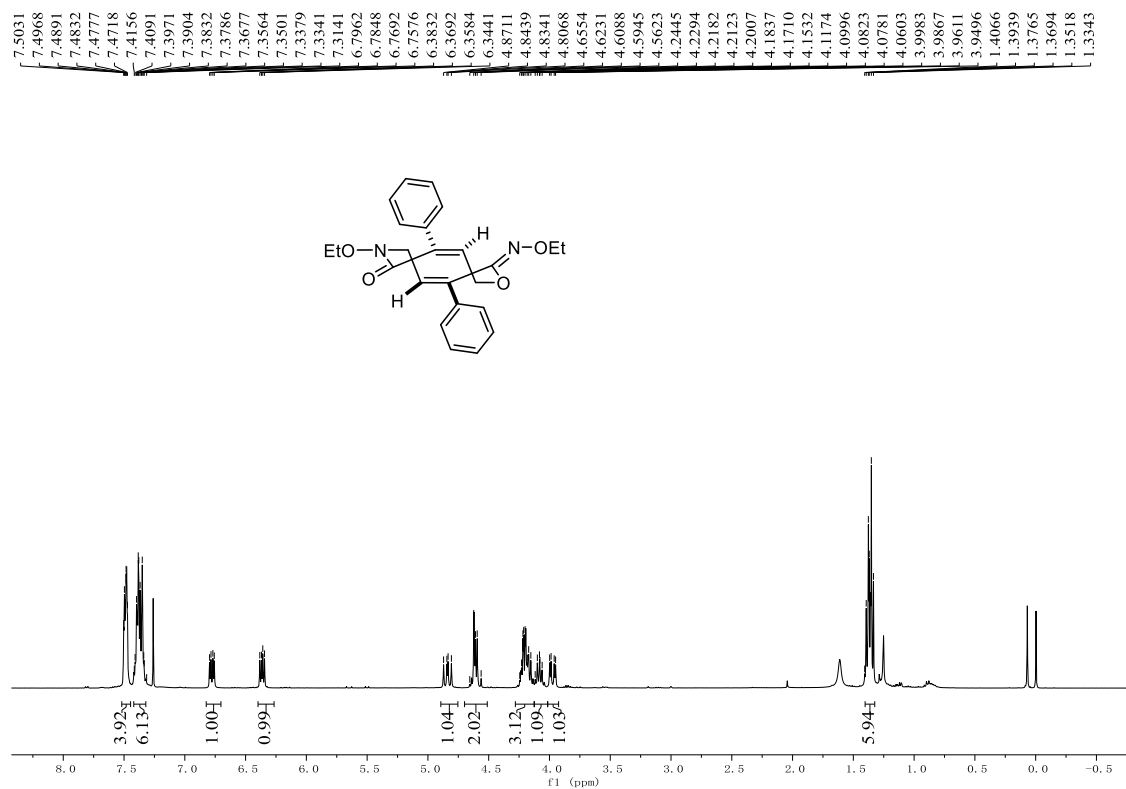

<sup>13</sup>C NMR (101 MHz, CDCl<sub>3</sub>) of **2m**

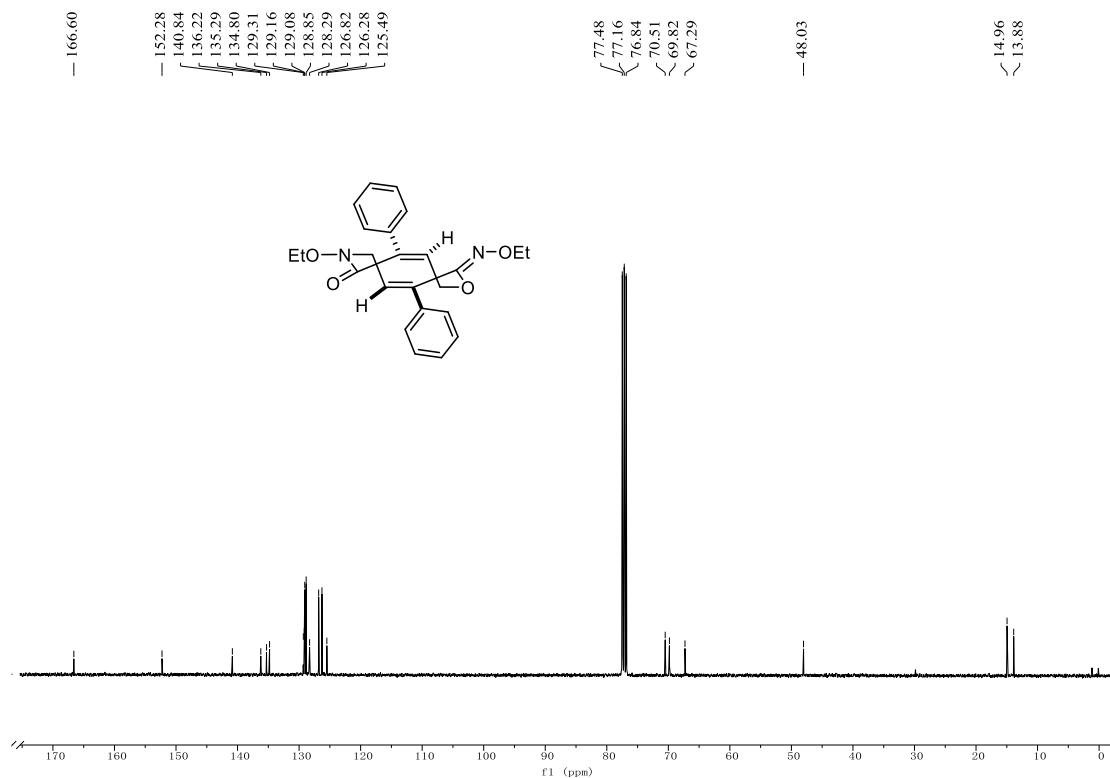

<sup>1</sup>H NMR (400 MHz, CDCl<sub>3</sub>) of **2n**

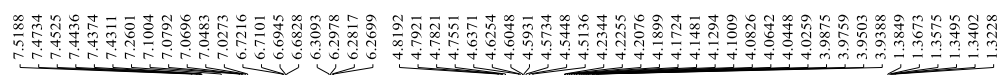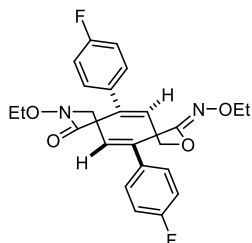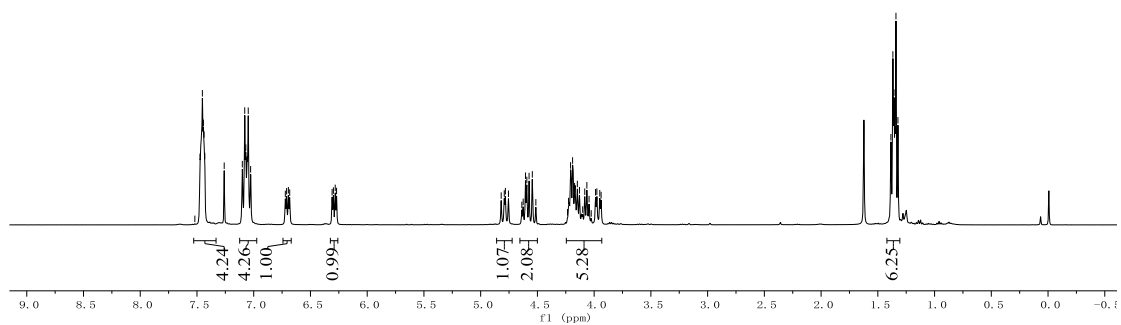

<sup>13</sup>C NMR (101 MHz, CDCl<sub>3</sub>) of **2n**

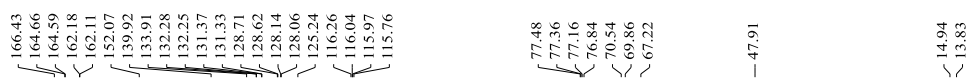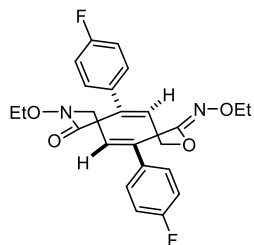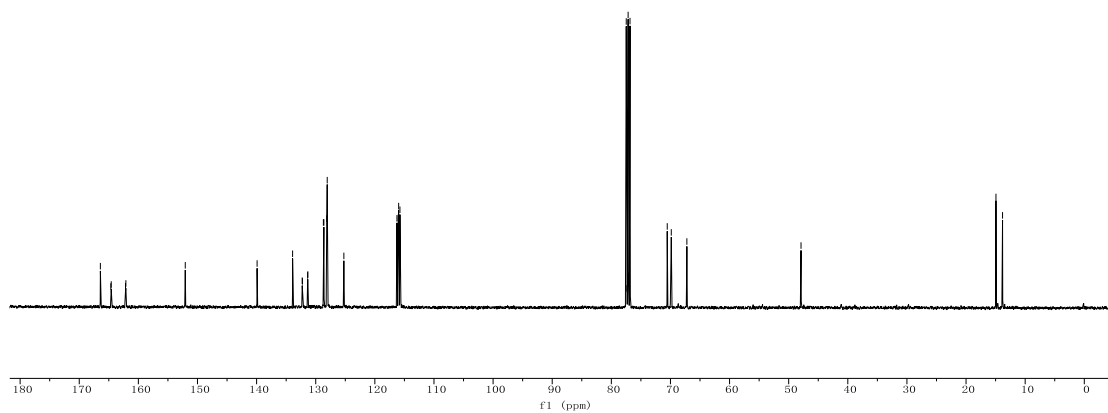



$^{19}\text{F}$  NMR (376 MHz,  $\text{CDCl}_3$ ) of **2n**

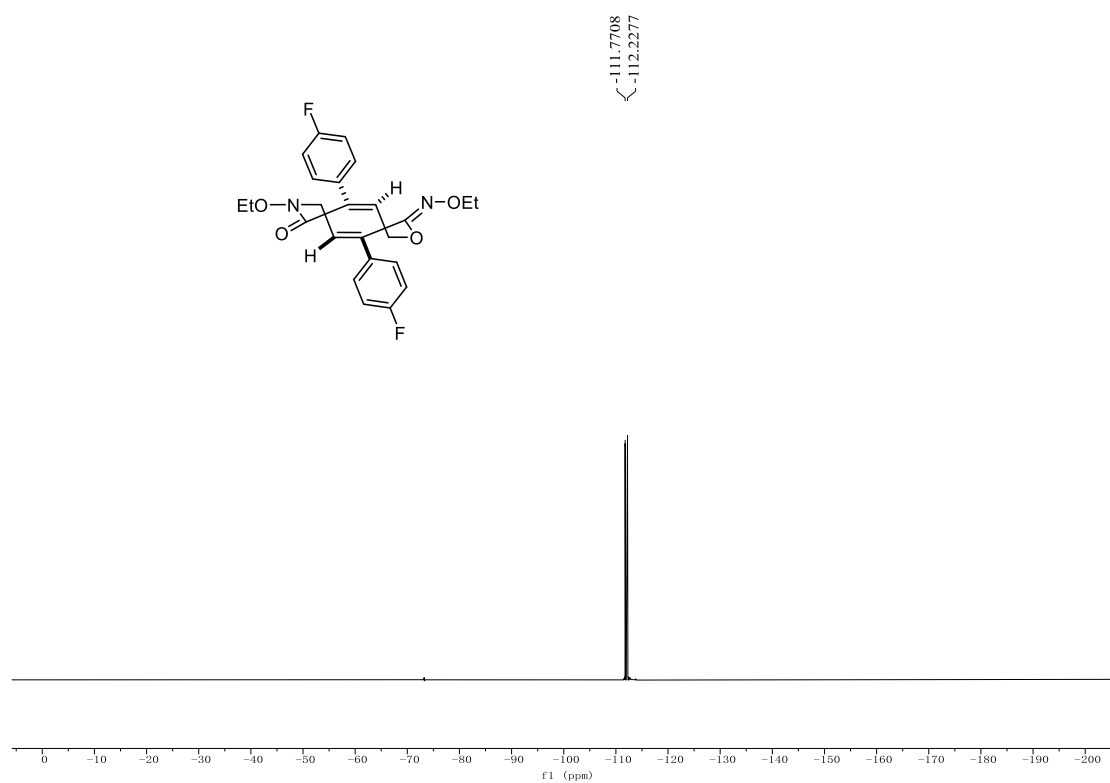

<sup>1</sup>H NMR (400 MHz, CDCl<sub>3</sub>) of **2o**

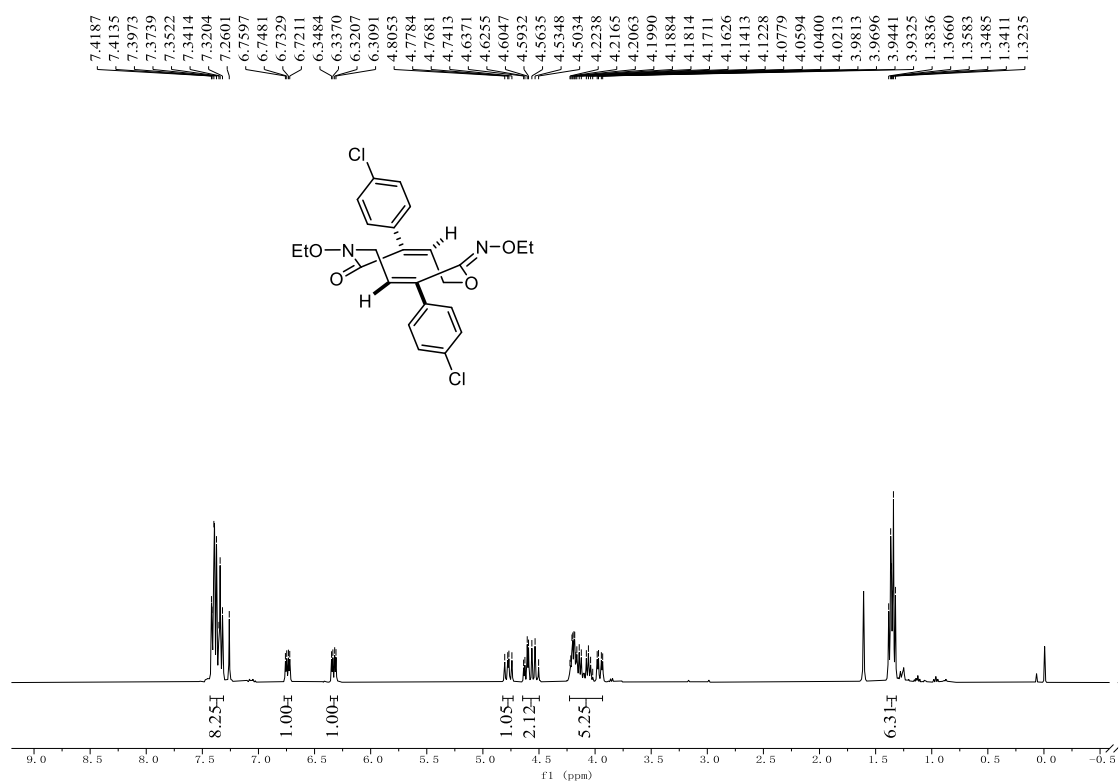

<sup>13</sup>C NMR (101 MHz, CDCl<sub>3</sub>) of **2o**

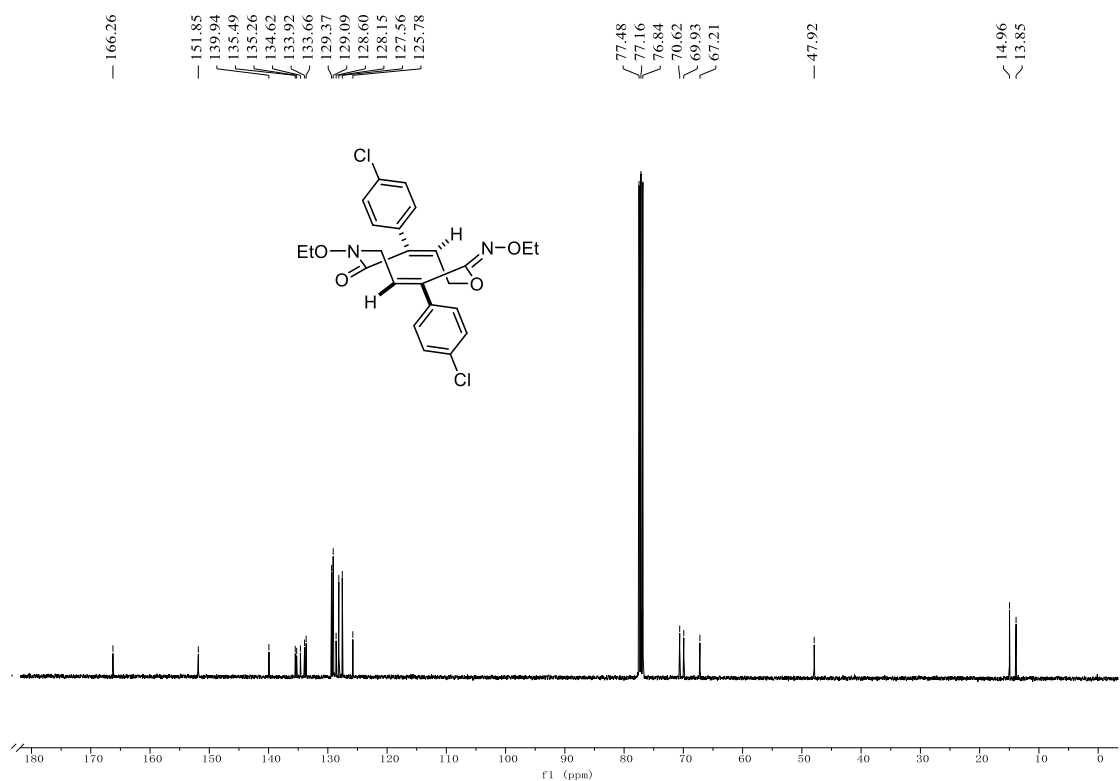

<sup>1</sup>H NMR (400 MHz, CDCl<sub>3</sub>) of **2p**

7.5359, 7.5196, 7.5146, 7.5011, 7.4962, 7.4796, 7.3517, 7.3456, 7.3352, 7.3302, 7.3239, 7.2529, 6.7538, 6.7388, 6.7269, 6.3560, 6.3446, 6.3285, 6.3169, 4.8012, 4.7743, 4.7640, 4.7371, 4.6309, 4.6194, 4.5987, 4.5871, 4.5591, 4.5314, 4.4991, 4.2323, 4.2156, 4.2057, 4.1808, 4.1633, 4.1361, 4.1185, 4.0935, 4.0757, 4.0582, 4.0407, 4.0190, 3.9724, 3.9607, 3.9353, 3.9236, 1.3424, 1.3248

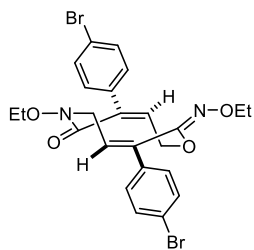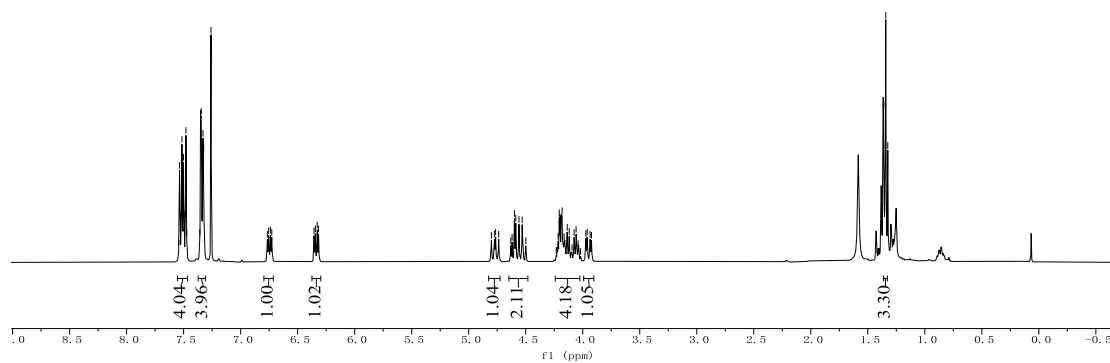

<sup>13</sup>C NMR (101 MHz, CDCl<sub>3</sub>) of **2p**

166.22, 151.79, 140.06, 135.13, 134.15, 134.04, 132.34, 132.06, 128.68, 128.44, 127.84, 125.85, 123.74, 123.53, 77.48, 77.16, 76.84, 70.63, 69.96, 67.21, 47.94, 14.96, 13.86

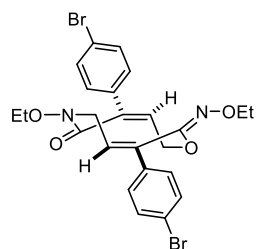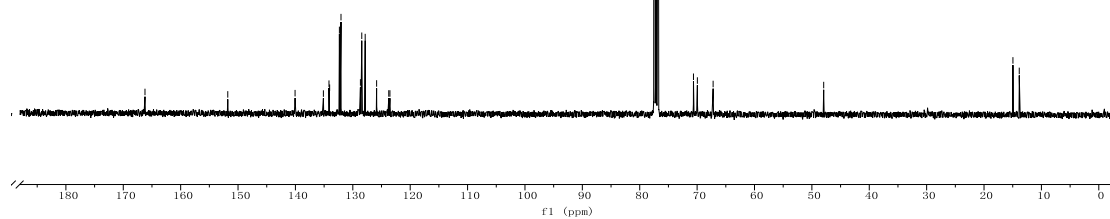

<sup>1</sup>H NMR (400 MHz, CDCl<sub>3</sub>) of **2q**

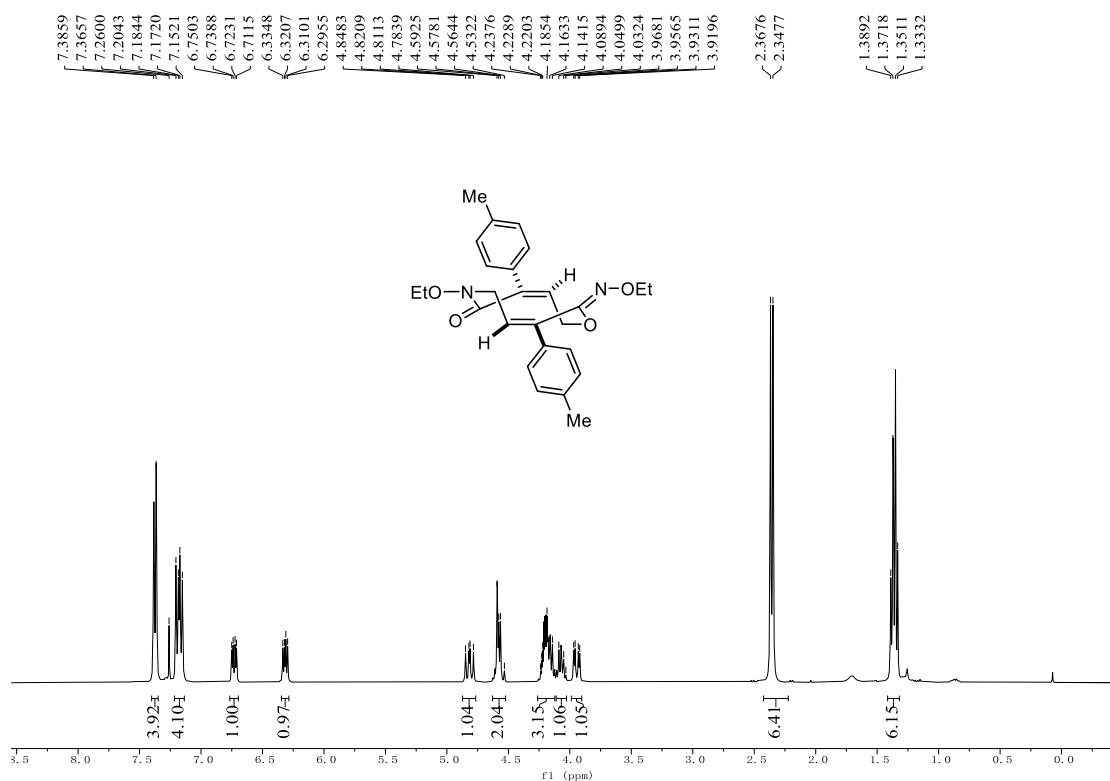

<sup>13</sup>C NMR (101 MHz, CDCl<sub>3</sub>) of **2q**

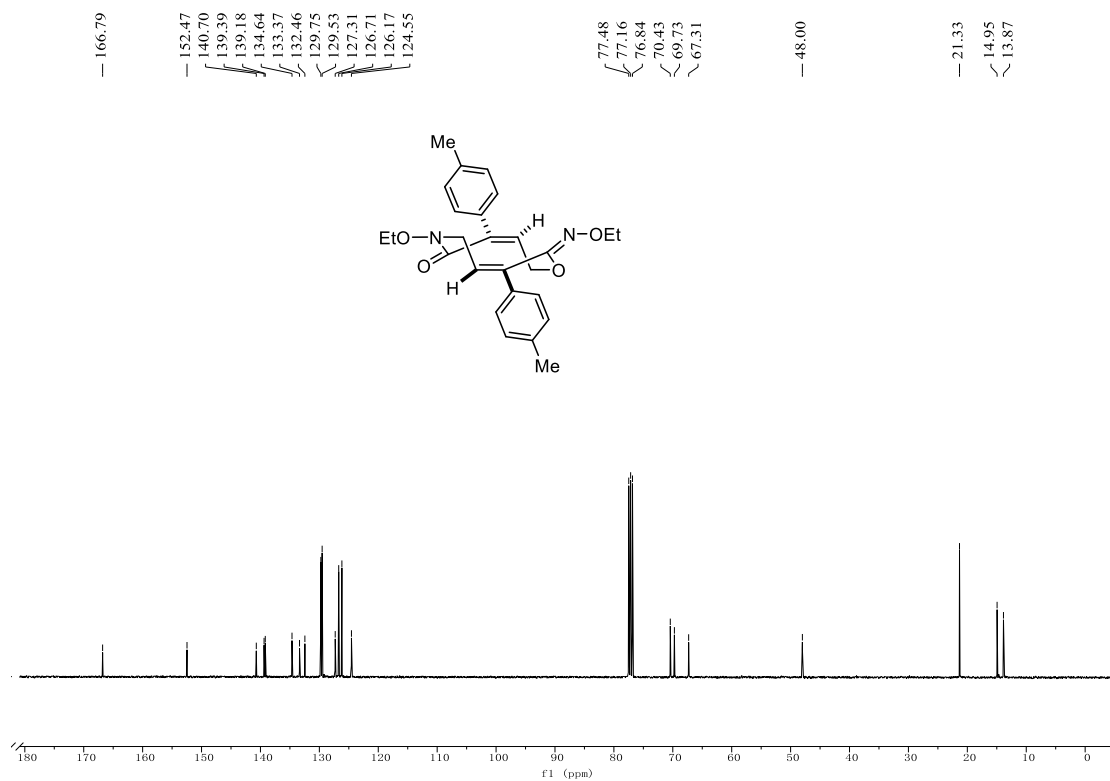

<sup>1</sup>H NMR (400 MHz, CDCl<sub>3</sub>) of 2r

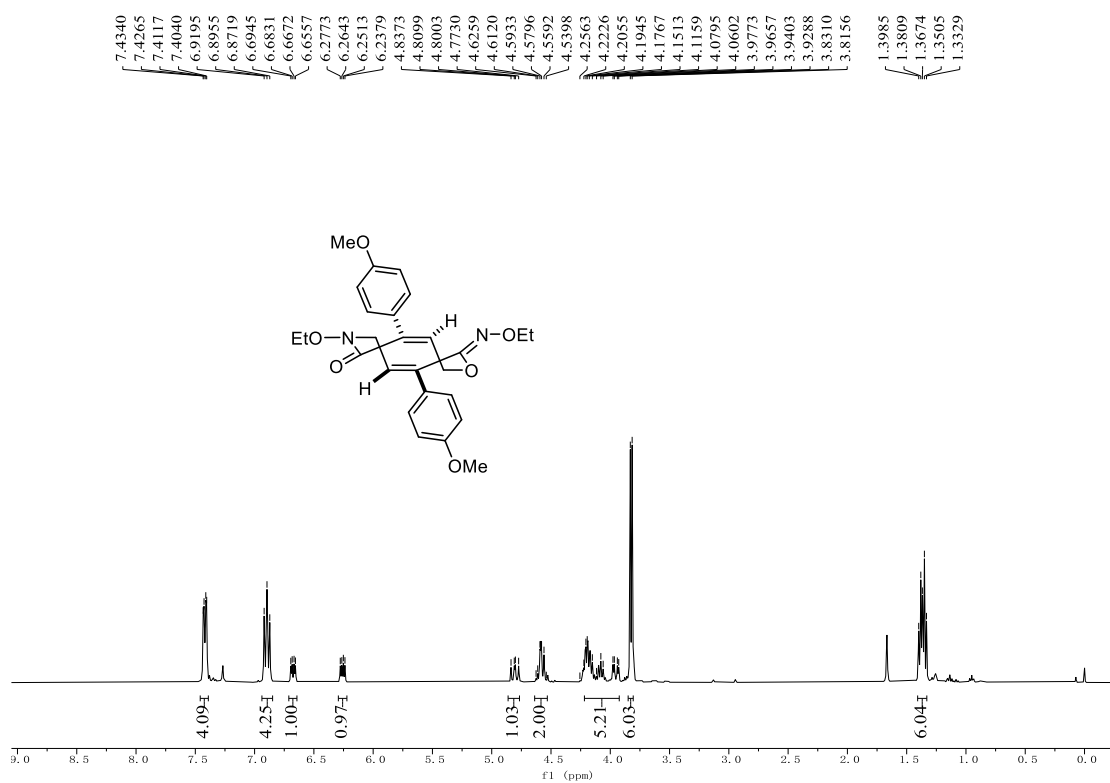

<sup>13</sup>C NMR (101 MHz, CDCl<sub>3</sub>) of 2r

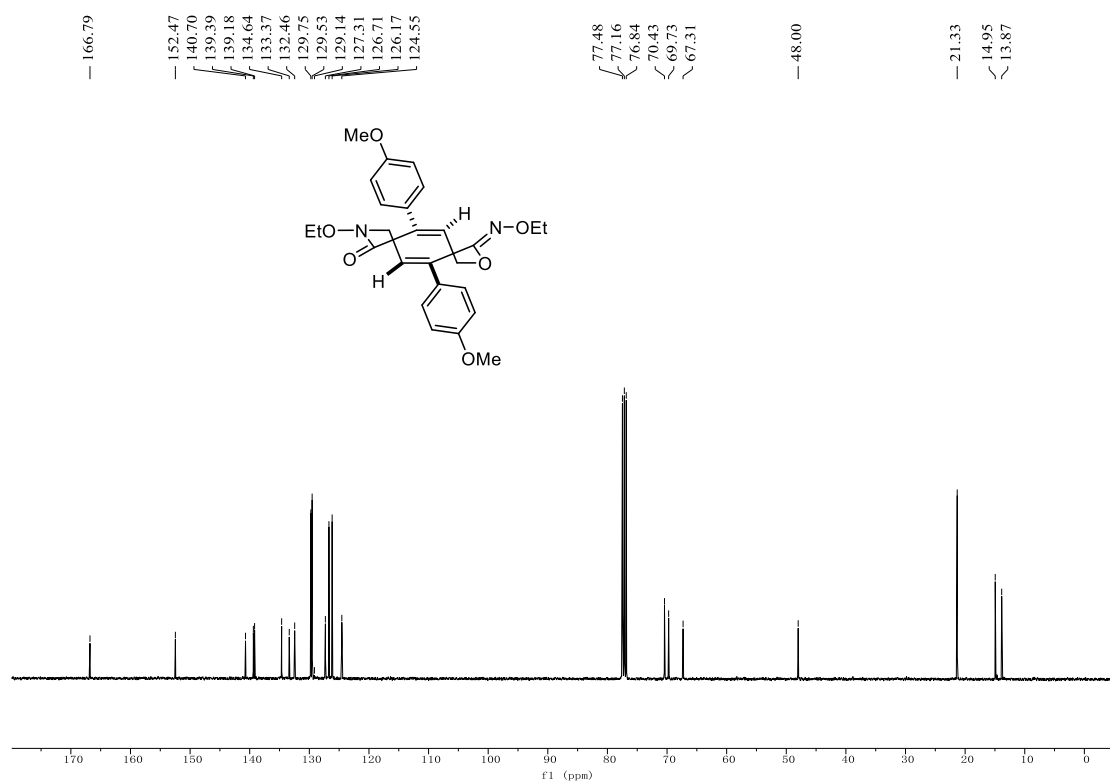

<sup>1</sup>H NMR (400 MHz, CDCl<sub>3</sub>) of **2s**

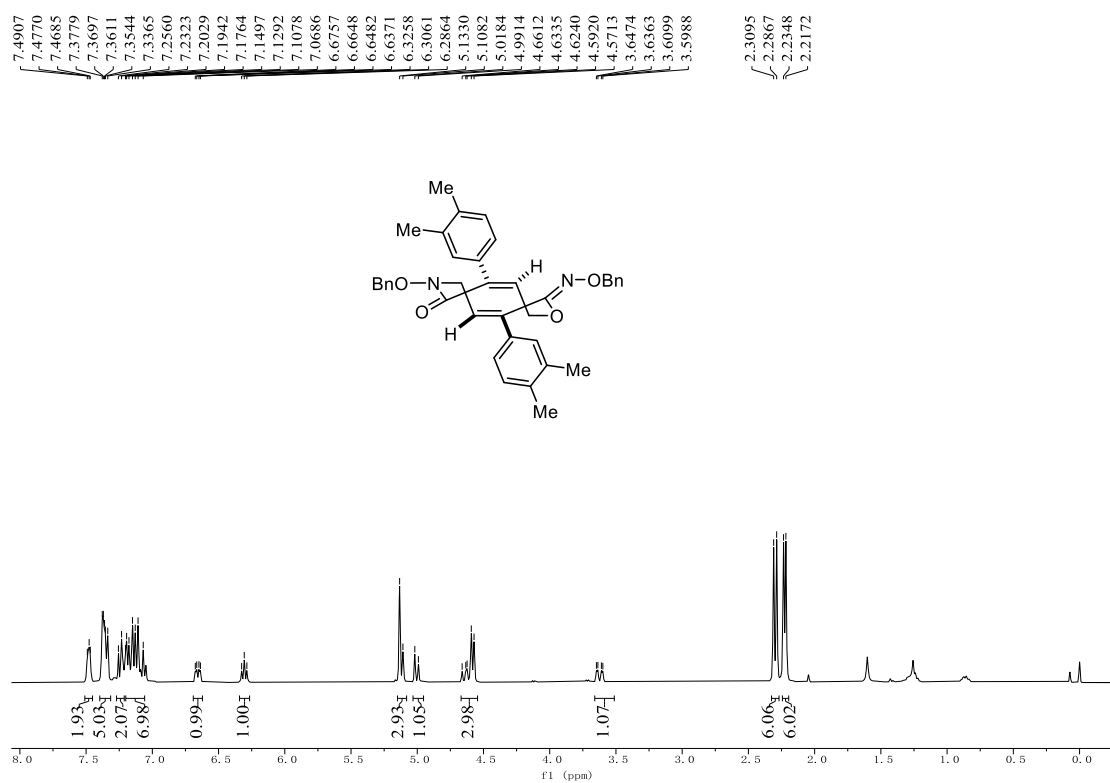

<sup>13</sup>C NMR (101 MHz, CDCl<sub>3</sub>) of **2s**

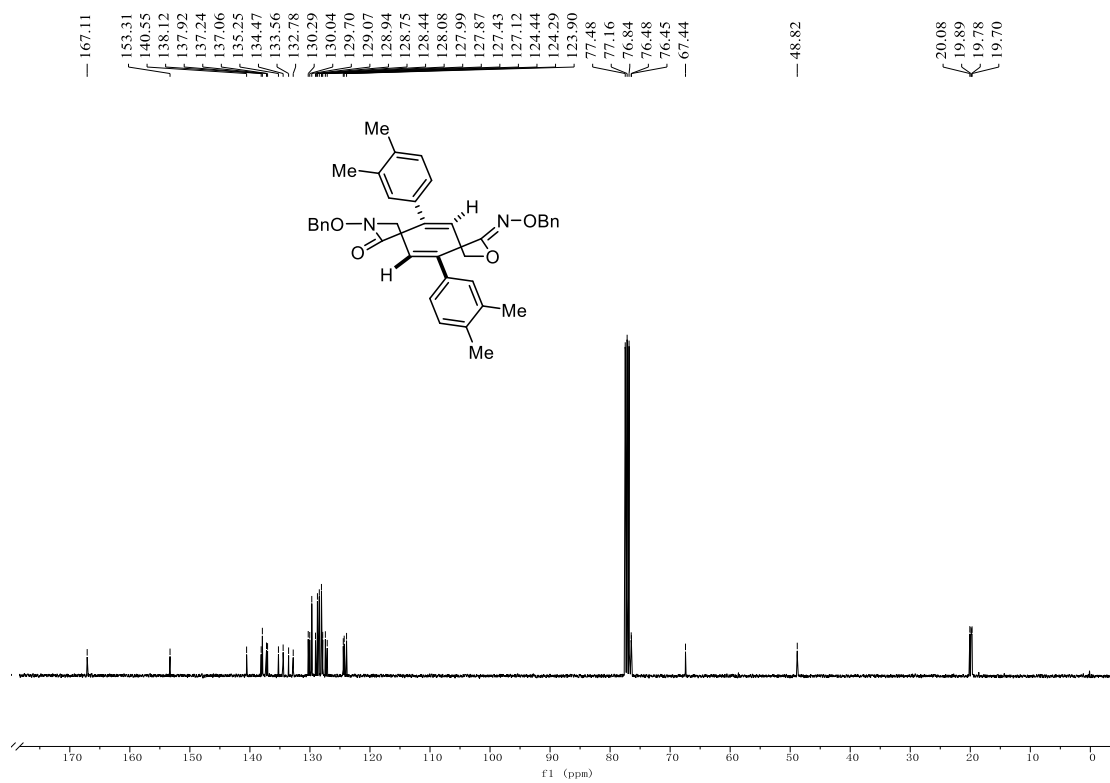

<sup>1</sup>H NMR (400 MHz, CDCl<sub>3</sub>) of **2t**

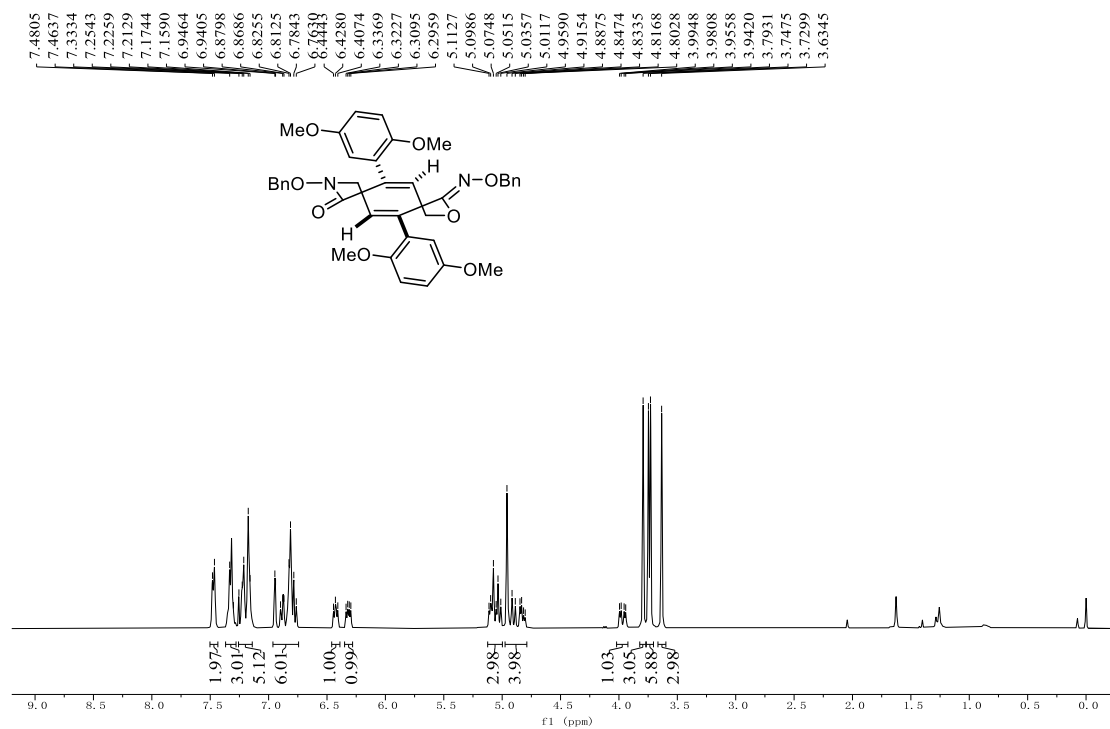

<sup>13</sup>C NMR (101 MHz, CDCl<sub>3</sub>) of **2t**

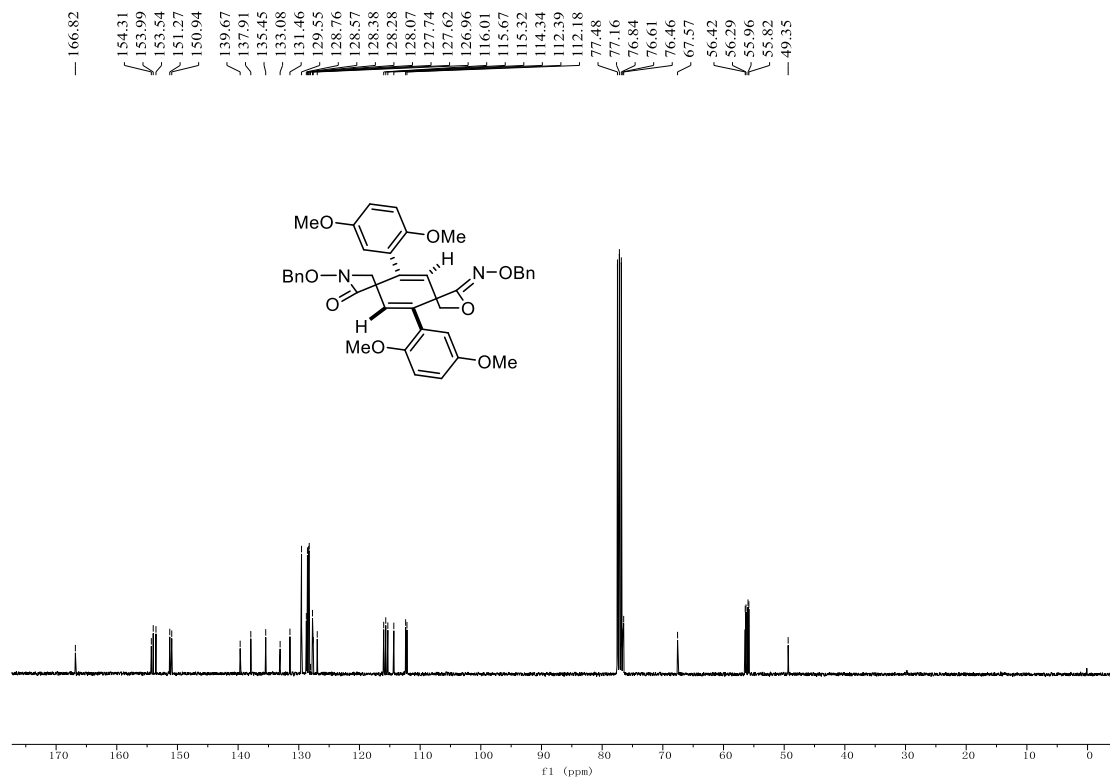

<sup>1</sup>H NMR (400 MHz, CDCl<sub>3</sub>) of **2u**

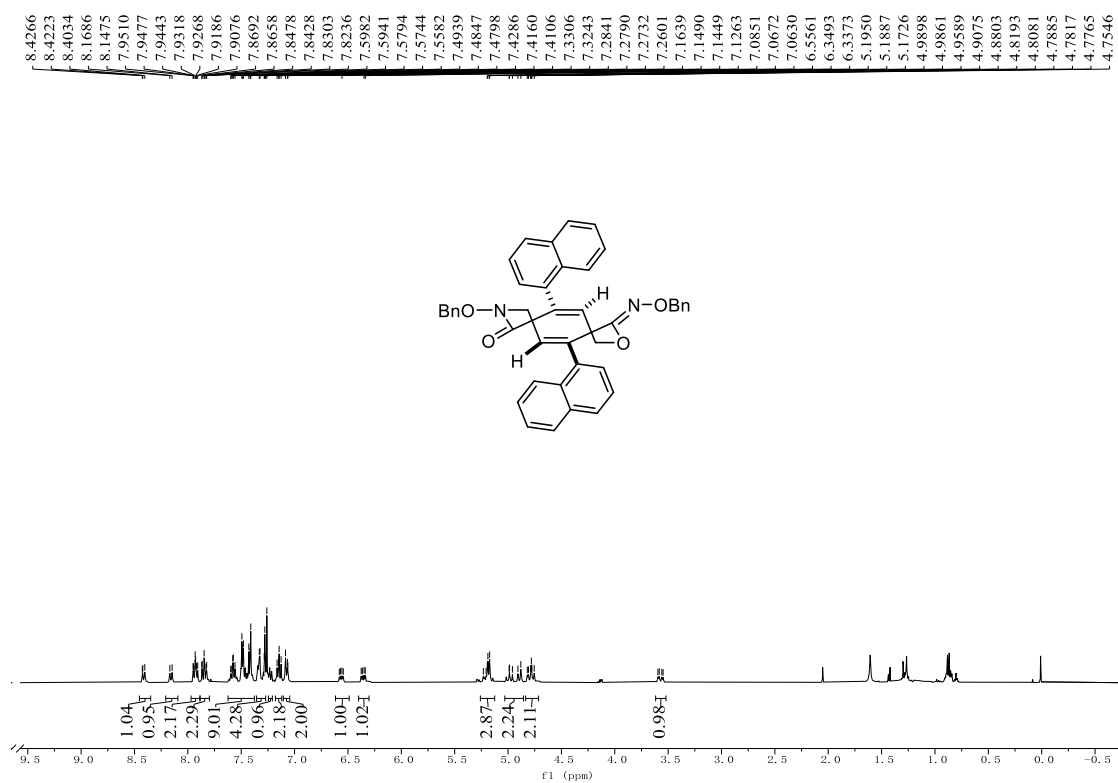

<sup>13</sup>C NMR (101 MHz, CDCl<sub>3</sub>) of **2u**

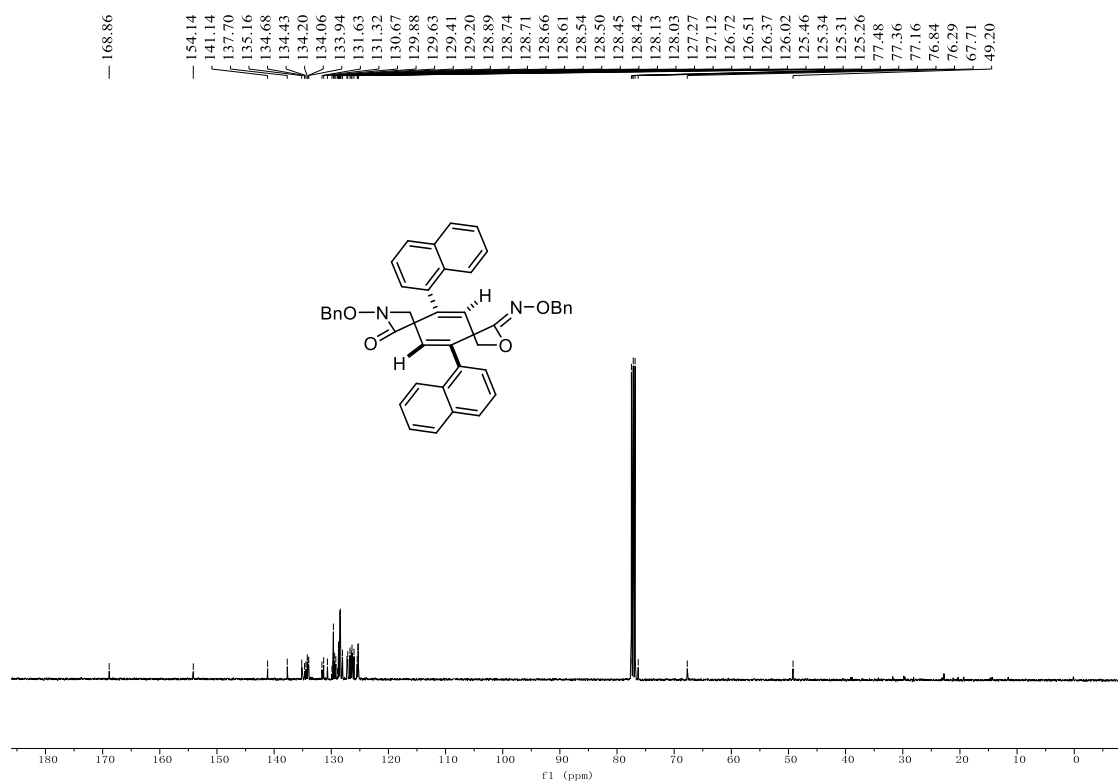



<sup>1</sup>H NMR (400 MHz, CDCl<sub>3</sub>) **3**

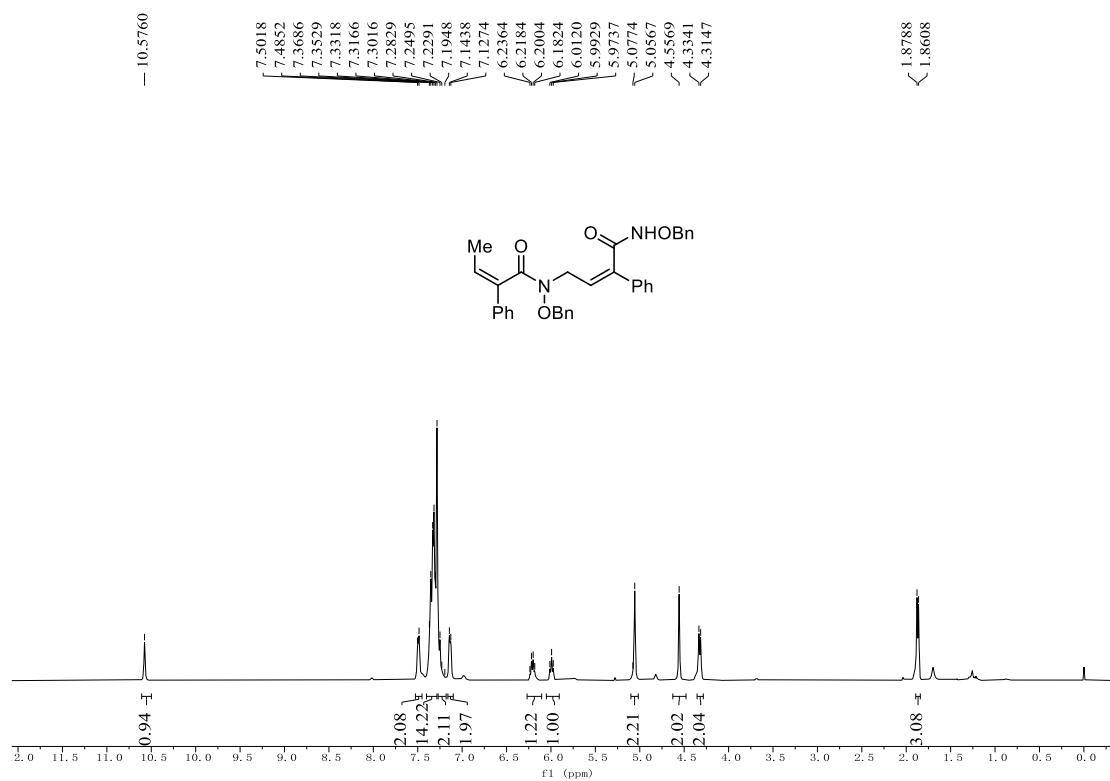

<sup>13</sup>C NMR (101 MHz, CDCl<sub>3</sub>) of **3**

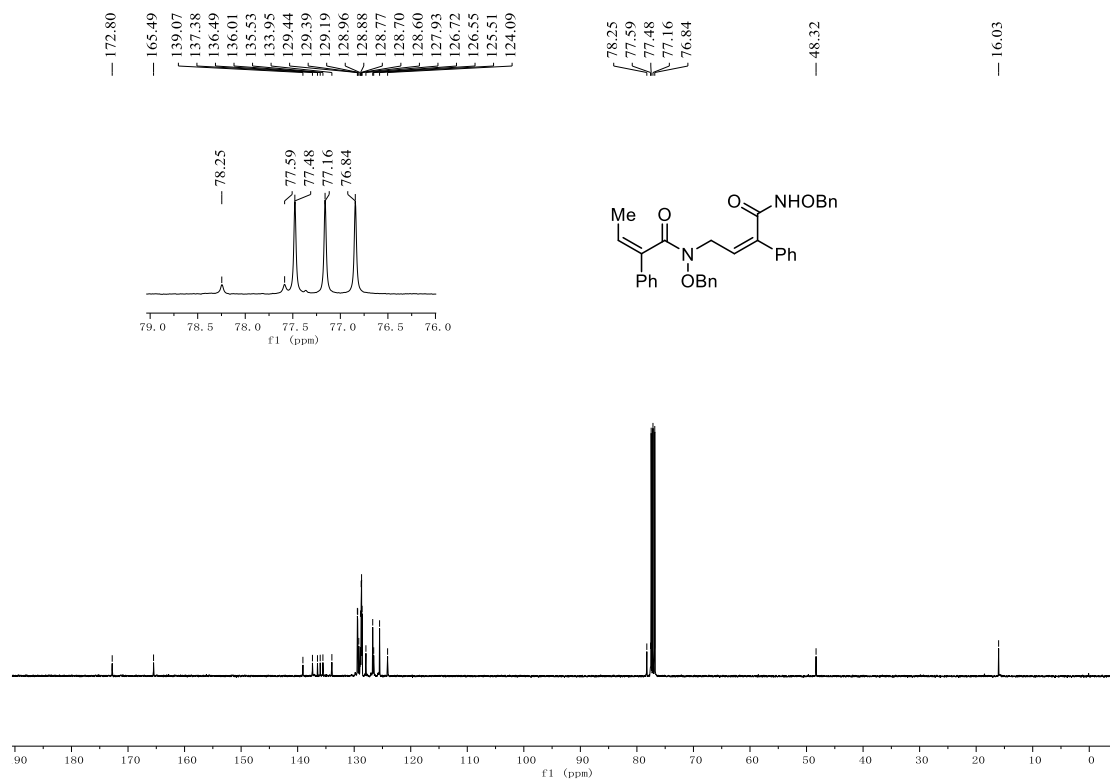

<sup>1</sup>H NMR (400 MHz, CDCl<sub>3</sub>) of **4**

7.3973  
7.3893  
7.3809  
7.3722  
7.3535  
7.2868  
7.2715  
7.1843  
7.1661  
6.2312  
6.2136  
6.2067  
6.1938  
5.0798  
5.0578  
5.0088  
4.9825  
4.7638  
4.7477  
4.7389  
3.8464  
3.8312  
3.8160  
3.5956  
3.5805

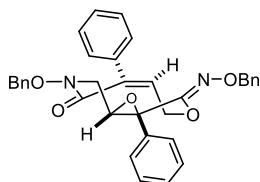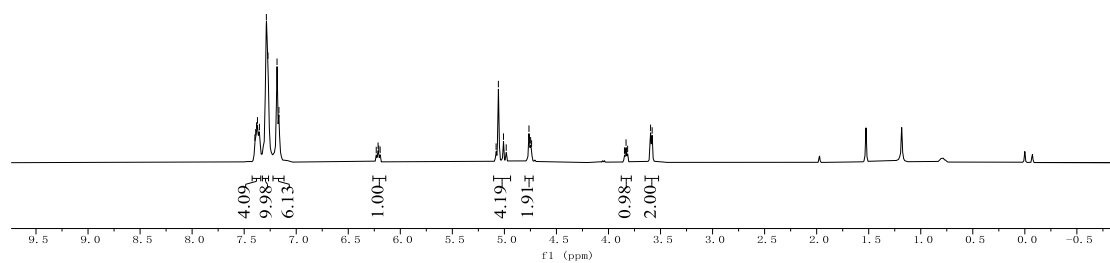

<sup>13</sup>C NMR (101 MHz, CDCl<sub>3</sub>) of **4**

165.41  
151.44  
140.95  
137.08  
134.99  
134.54  
134.49  
129.84  
129.45  
129.38  
129.34  
129.12  
128.84  
128.80  
128.59  
128.55  
128.24  
127.20  
126.21  
125.61  
77.48  
77.16  
76.84  
76.48  
67.46  
61.34  
59.60  
48.19  
29.83

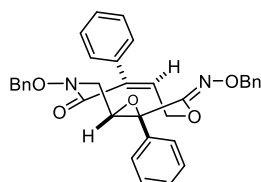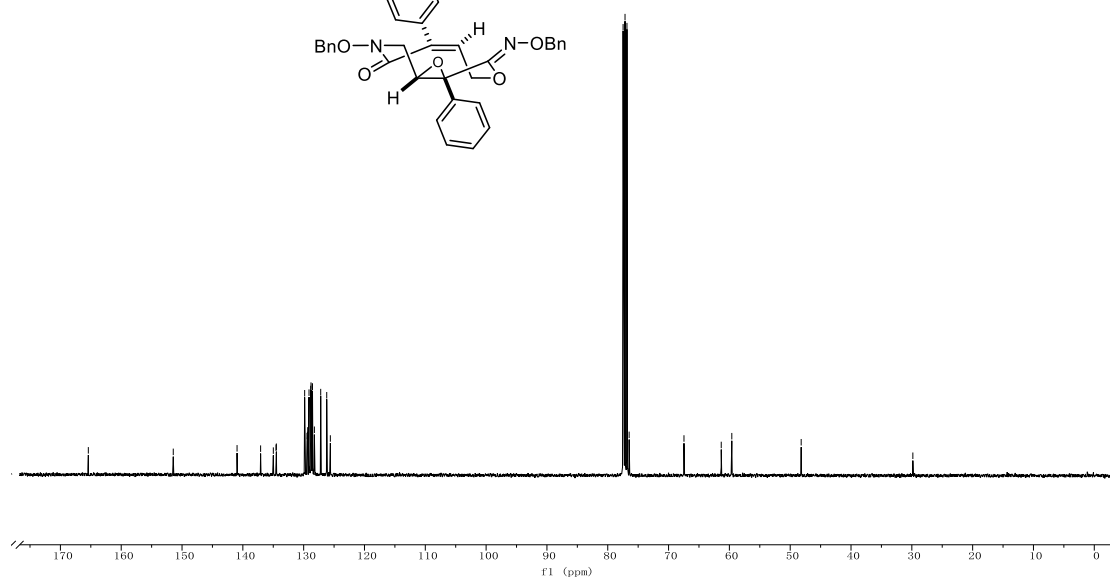

Supplement: d4qo00609g1.pdf [file d4qo00609g1.pdf]
